1  
2  
3  
4  
5  
6  
7  
8  
9  
10  
11  
12  
13  
14  
15  
16  
17  
18  
19  
20  
21  
22  
23  
24  
25  
26  
27  
28  
29  
30  
31  
32  
33  
34

## Single-molecule imaging reveals control of parental histone recycling by free histones during DNA replication

Dominika T. Gruszka<sup>1</sup>, Sherry Xie<sup>1</sup>, Hiroshi Kimura<sup>2</sup> and Hasan Yardimci<sup>1,\*</sup>

<sup>1</sup>The Francis Crick Institute, 1 Midland Road, London, NW1 1AT, UK

<sup>2</sup>Cell Biology Center, Institute of Innovative Research, Tokyo Institute of Technology, 4259 Nagatsuta-cho, Midori-ku, Yokohama 226-8503, Japan

\*Correspondence: [hasan.yardimci@crick.ac.uk](mailto:hasan.yardimci@crick.ac.uk)

### SUMMARY:

Faithful replication of chromatin domains during cell division is fundamental to eukaryotic development. During replication, nucleosomes are disrupted ahead of the replication fork, followed by their rapid reassembly on daughter strands from the pool of recycled parental and newly synthesized histones. Here, we use single-molecule imaging and replication assays in *Xenopus laevis* egg extracts to determine the outcome of replication fork encounters with nucleosomes. Contrary to current models, the majority of parental histones are evicted from the DNA, with histone recycling, nucleosome sliding and replication fork stalling also occurring but at lower frequencies. The anticipated local histone transfer only becomes dominant upon depletion of free histones from extracts. Our studies provide the first direct evidence that parental histones remain in close proximity to their original locus during recycling and reveal that provision of excess histones results in impaired histone recycling, which has the potential to affect epigenetic memory.

(Word count: 148)

## 35 INTRODUCTION

36 Eukaryotic genomes are organized into chromatin, which influences many cellular processes, ranging  
37 from DNA replication and repair to gene transcription. The basic unit of chromatin is a nucleosome,  
38 which consists of 145–147 base pairs of DNA wrapped around an octameric histone protein core,  
39 formed from two copies of each of the four histones: H2A, H2B, H3 and H4. Histones H3 and H4  
40 assemble into a symmetric hetero-tetramer and the two H2A–H2B dimers are docked onto the (H3–  
41 H4)<sub>2</sub> tetramer (Luger et al., 1997). Nucleosomes are very stable nucleoprotein complexes but they are  
42 also highly dynamic with regards to their conformation, composition and positioning within chromatin  
43 (Lai and Pugh, 2017; Zhou et al., 2019). Nucleosome dynamics control DNA accessibility and are  
44 regulated by complex interplay of numerous factors, such as chromatin remodelers, histone  
45 chaperones, modifying enzymes and polymerases (Lai and Pugh, 2017).

46 Chromatin is partitioned into domains, which either promote or block transcription, and  
47 hence determine the cellular identity. Nucleosomes in transcriptionally active and silenced chromatin  
48 domains carry specific histone post-translational modifications (PTMs) and/or distinct histone  
49 sequence variants. The disordered tails of histones H3 and H4 are primary targets for PTMs associated  
50 with different chromatin states; for example, tri-methylation of histone H3 at lysine 36 (H3-K36Me3)  
51 and acetylation of histone H4 at lysine 16 (H4-K16Ac) mark transcriptionally active chromatin, whereas  
52 tri-methylation of histone H3 at lysine 9 and 27 (H3-K9Me3 and H3-K27Me3) tag transcriptionally  
53 silenced chromatin domains (Reinberg and Vales, 2018; Stillman, 2018). Therefore, maintenance of  
54 cellular identity through mitotic cell division relies on faithful transfer of information encoded in both  
55 DNA sequence (genetic inheritance) and nucleosome landscape (epigenetic inheritance).  
56 Semiconservative DNA replication ensures genetic inheritance, but it presents a major challenge to  
57 chromatin, which undergoes significant structural reorganization, starting from disassembly of  
58 parental nucleosomes and ending in restoration of nucleosome landscape on daughter strands  
59 (Alabert et al., 2017; MacAlpine and Almouzni, 2013; Ramachandran and Henikoff, 2015; Serra-  
60 Cardona and Zhang, 2018). The molecular mechanisms of replication-coupled epigenetic inheritance  
61 are poorly understood.

62 In order to allow parental DNA unwinding and subsequent nascent strand synthesis, each and  
63 every nucleosome must be transiently disrupted ahead of the replication fork. Nucleosome  
64 destabilization is localized to an average of two nucleosomes immediately ahead of the replication  
65 fork (Gasser et al., 1996) and leads to release of (H3–H4)<sub>2</sub> tetramer and H2A–H2B dimers from the  
66 DNA (Jackson, 1990; Xu et al., 2010). It remains unclear what molecular forces trigger the localized  
67 nucleosome eviction but a number of physical and chromatin factors have been implicated in this  
68 process, including unzipping (Shundrovsky et al., 2006) and positive supercoiling (Gupta et al., 2009)

69 of the DNA, physical collision between the nucleosome and the replisome (Sogo et al., 1986), and  
70 histone chaperone complex FACT (Foltman et al., 2013; Kurat et al., 2017).

71 After passage of the replication fork, nucleosomes are rapidly reassembled on the two  
72 daughter strands, from the pool of recycled parental and newly synthesized histones. Nucleosome  
73 reassembly starts with the deposition of (H3–H4)<sub>2</sub> tetrameric histone core, followed by the association  
74 of two H2A–H2B dimers (Alabert et al., 2017; MacAlpine and Almouzni, 2013; Ramachandran and  
75 Henikoff, 2015). Current models suggest that nucleosomes deposited on newly replicated DNA  
76 contain either parental or new H3–H4 histones (with the exception of nucleosomes containing H3.3  
77 variant). This implies two distinct replication-coupled nucleosome assembly pathways on nascent  
78 DNA: the transfer (recycling) of parental histones released from nucleosomes disrupted by the  
79 replisome passage and *de novo* deposition of newly synthesized histones. Nucleosomal H2A–H2B  
80 dimers are more dynamic than (H3–H4)<sub>2</sub> tetramers and readily exchange with the pool of newly  
81 synthesized histones throughout the cell cycle (Annunziato, 2013; Jackson, 1990; Kimura and Cook,  
82 2001; Louters and Chalkley, 1985; Thiriet and Hayes, 2006). Consequently, old and newly synthesized  
83 H2A–H2B dimers can form nucleosomes with both parental and new (H3–H4)<sub>2</sub> tetramers (Annunziato,  
84 2015; Xu et al., 2010).

85 Quantitative proteomics studies indicate that nucleosomes deposited on newly replicated  
86 DNA are composed of approximately equal amounts of new and old H2A, H2B, H3 and H4 histones  
87 (Alabert et al., 2015), implying that all parental histones are fully recycled during replication. It has  
88 also been reported that parental histones are recycled with PTMs (Alabert et al., 2015) and that their  
89 genomic localization, whether in active or repressed chromatin, is preserved on daughter strands  
90 through histone recycling (Madamba et al., 2017; Reveron-Gomez et al., 2018). However, recent  
91 studies using mouse embryonic stem cells demonstrated that while repressed chromatin domains are  
92 indeed preserved through the local re-deposition of parental H3–H4 histones at the replication fork,  
93 parental H3–H4 histones associated with active chromatin domains did not exhibit such preservation  
94 (Escobar et al., 2019). Furthermore, fluorescence imaging-based analysis of parental H3 histone  
95 recycling in HeLa cells over two cell divisions revealed rates of parental histone loss that were higher  
96 than the expected 50% per cell cycle (Clement et al., 2018).

97 Recent studies into the mechanism of parental histone segregation onto replicating DNA  
98 showed that histones H3–H4 distribute more or less equally between the two strands; depending on  
99 the study, a weak bias was observed towards either the leading (Petryk et al., 2018) or lagging strand  
100 (Yu et al., 2018). Importantly, several replisome components are involved in parental histone  
101 segregation. The N-terminal domain of MCM2, a component of the CMG replicative helicase, contains  
102 a histone H3–H4-binding domain (Huang et al., 2015; Ishimi et al., 1998) and promotes the transfer of

103 parental H3–H4 to the lagging strand (Petryk et al., 2018), in association with the Ctf4 adaptor protein  
104 and Pol  $\alpha$  (Gan et al., 2018). Dpb3 and Dpb4, two non-essential subunits of yeast Pol  $\epsilon$ , facilitate the  
105 parental H3–H4 transfer to the leading strand (Yu et al., 2018). In addition, various histone  
106 chaperones, chromatin factors and other replisome components have been implicated in parental  
107 histone recycling and/or the inheritance of chromatin states (Alabert et al., 2017; Serra-Cardona and  
108 Zhang, 2018). Taken together, these findings support a mechanism for replication-coupled parental  
109 histone recycling whereby, upon eviction from the DNA, parental histones H3–H4 are retained close  
110 to the replisome through a series of protein-protein interactions, resulting in their targeted and  
111 localized re-deposition behind the replication fork.

112 To date, most studies looking into the mechanisms of replication-coupled parental histone  
113 recycling employ bulk and/or steady-state approaches, which lack the spatial and temporal resolution  
114 needed to unravel the molecular detail of this highly dynamic process. Here, we report a real-time  
115 single-molecule imaging platform that utilizes microfluidics-based DNA replication in *Xenopus laevis*  
116 egg extracts, protein engineering and TIRF microscopy to gain mechanistic insight into the outcome  
117 of replication fork collision with nucleosomes. Our approach allows simultaneous visualization of  
118 parental histones and replication forks as they navigate through the nucleosomal environment of  
119 individual DNA molecules.

120

## 121 RESULTS

### 122 Assembly of fluorescent nucleosomes on $\lambda$ DNA

123 Building on the single-molecule methodology developed by (Loveland et al., 2012), which allows real-  
124 time imaging of growing replication bubbles in *Xenopus* egg extracts, we wanted to visualize fork  
125 collisions with nucleosomes. To be able to track nucleosomes during replication, we labelled *Xenopus*  
126 *laevis* histones H2A, H2B, H3 and H4 with small fluorescent dyes using thiol-modifications of  
127 engineered cysteines (Figures 1A and 1B). Histones were expressed and purified from *Escherichia coli*  
128 that did not carry any post-translational modifications, as verified by mass spectrometry (Table S1).  
129 To ensure that our observations are representative of nucleosome dynamics, we labelled all four  
130 histones, at various positions in their structure, using different fluorophores. Histones H2A and H2B  
131 were labelled at their C-termini; H2A was labelled with Cy5 at position 119 (H2A-K119C<sup>Cy5</sup>; 66%  
132 labelling efficiency) and H2B was labelled with AlexaFluor647 at position 112 (H2B-T112C<sup>A647</sup>; 45%  
133 labelling efficiency). Histone H3 was labelled with Cy5 at position 36 (H3-K36C<sup>Cy5</sup>; near 100% labelling  
134 efficiency), in the disordered tail, and with AlexaFluor647 at position 80 (H3-T80C<sup>A647</sup>; 30% labelling  
135 efficiency), in the folded histone core. Histone H4 was labelled with AlexaFluor647 at position 63 (H4-  
136 E63C<sup>A647</sup>; 95% labelling efficiency), within the histone fold (Figures 1A and 1B).

137 Histone octamers, containing one of the four histones labelled fluorescently, were then used  
138 to reconstitute nucleosomes on biotinylated  $\lambda$  DNA (Figure 1). Nucleosome reconstitution was carried  
139 out by NaCl gradient dialysis, which recapitulates thermodynamically favorable binding distributions  
140 (Sekinger et al., 2005; Thastrom et al., 2004a; Thastrom et al., 2004b; Widom, 1998). Histone  
141 deposition and correct nucleosome folding on  $\lambda$  DNA were verified by electrophoretic mobility shift  
142 assay (EMSA) and micrococcal nuclease (MNase) protection assay (Figures 1C-F). Both assays were  
143 performed under native conditions allowing direct visualization of the fluorescent histone within  
144 intact nucleosomes and the DNA through SYBR Gold staining (Figures 1C and 1D). The deposition of  
145 histone octamers on  $\lambda$  DNA leads to size increase and is manifested in EMSA by the apparent shift of  
146 the  $\lambda$  DNA band (relative to naked  $\lambda$ ), detected by both SYBR Gold and histone fluorescence (Figure  
147 1C). The native MNase assay (Figures 1D and 1F), in which histone-free DNA is preferentially digested  
148 by MNase without subsequent deproteination, confirmed correct nucleosome formation. MNase  
149 digest of all tested nucleosomal  $\lambda$  templates produced intact mono- and di-nucleosomes whereas  
150 naked  $\lambda$  DNA was fully digested. The intercalating DNA stain SYBR Gold binds inefficiently to DNA  
151 wrapped around histone octamers resulting in a weaker DNA signal in the native MNase protection  
152 assay (and EMSA of saturated nucleosomal templates). Thus, in addition, we conducted a denaturing  
153 MNase protection assay (Figures 1E and 1F), in which the MNase-treated nucleosomal  $\lambda$  DNA  
154 templates were further subjected to proteinase K digest, yielding the expected histone-protected DNA

155 fragments of ~150 and ~300 bp, consistent with mono- and di-nucleosome protected DNA,  
156 respectively. Taken together, these results clearly demonstrate the correct folding of WT and  
157 fluorescent nucleosomes on  $\lambda$  DNA.

158

### 159 **Fluorescent nucleosomes on $\lambda$ DNA are discretely distributed in a ‘beads-on-a-string’ manner**

160 By varying the octamer:DNA molar ratio in our reconstitution reactions we achieved different levels  
161 of nucleosome saturation (Figure 2). The deposition of increasing amounts of histone octamer on  
162  $\lambda$  DNA was illustrated in EMSA by a steady increase in histone fluorescence and a gradual shift of the  
163  $\lambda$  DNA band (Figures 2A and 2B). The associated native MNase protection assay revealed a  
164 corresponding increase in the amount of protected nucleosomal species (mono-, di- and tri-  
165 nucleosomes), confirming that the observed increase in the template size is due to correct  
166 nucleosome formation rather than non-specific histone-DNA interactions.

167 To visualize fluorescent nucleosomes on individual  $\lambda$  DNA molecules, we used microfluidics  
168 devices with a PEGylated and streptavidin-functionalized glass surface in combination with total  
169 internal reflection fluorescence (TIRF) microscopy (Figures 2C-G). Biotinylated  $\lambda$  DNA molecules  
170 containing pre-assembled fluorescently-labelled nucleosomes were first stretched under flow (to  
171 approximately 70% of the maximally stretched form) and tethered at both ends to the surface. The  
172 fluorescent DNA stain SYTOX Orange was then introduced into the chamber and both the DNA and  
173 fluorescent histone in nucleosomes were imaged in TIRF using 561- and 640-nm lasers, respectively  
174 (Figures 2C-E). Figures 2C and 2D show the images of individual  $\lambda$  molecules at increasing density of  
175 nucleosomes labelled at H2A-K119C with Cy5 and H4-E63C with AlexaFluor647, respectively.  
176 Fluorescent nucleosomes are discretely distributed on SYTOX-stained  $\lambda$  DNA as ‘beads-on-a-string’.  
177 As more nucleosomes are deposited on the DNA, the associated fluorescence signal of the labelled  
178 histone increases and appears more contiguous. Consistent with the DNA wrapping around the  
179 octameric histone core, we also observed apparent shortening of the  $\lambda$  DNA contour length upon  
180 nucleosome deposition, in a nucleosome density (histone octamer concentration)-dependent  
181 manner. We quantified this ‘shortening’ effect for samples shown in Figures 2A and 2B by measuring  
182 the contour length of approximately 400 individual molecules per sample and plotting the histograms  
183 (Figures 2F and 2G). As expected, the mean contour length decreased for nucleosomal samples  
184 reconstituted with higher concentrations of histone octamer and the length distributions became  
185 broader. At very high histone octamer:DNA ratios, the molecules appeared as intense diffraction-  
186 limited spots of fluorescence (Figures 2C and 2D, bottom panels) that, in contrast to singly-tethered  
187 low density nucleosomal templates, did not stretch under buffer flow (Videos 1 and 2).

188

## 189 **Assay for single-molecule imaging of parental histones during DNA replication**

190 To investigate the dynamics of parental histones during DNA replication, we combined real-time TIRF  
191 imaging with microfluidics-based replication assays in nucleus-free *Xenopus laevis* egg extracts (Figure  
192 3A) (Lebofsky et al., 2009; Loveland et al., 2012; Yardimci et al., 2012). Stretched  $\lambda$  DNA containing  
193 pre-assembled fluorescent nucleosomes (one of the histones labelled fluorescently with either Cy5 or  
194 AlexaFluor647) was attached to the surface of the microfluidic flow cell as described above. The  
195 nucleosomal templates were then incubated for approximately 15 minutes in a high-speed  
196 supernatant (HSS) of *Xenopus* eggs to promote sequence non-specific origin licensing (i.e. the ORC-  
197 dependent assembly of pre-replication complexes). Next, a concentrated nucleoplasmic extract (NPE)  
198 was introduced into the microfluidic chamber, which initiates and supports efficient bidirectional  
199 replication. The number of replication initiations per DNA template was regulated by adding the Cdk2  
200 inhibitor p27<sup>Kip</sup> (Walter and Newport, 2000; Yardimci et al., 2010). To allow visualization of replication  
201 fork progression in real time, NPE was supplemented with a fluorescent fusion protein Fen1-KikGR,  
202 which decorates replication bubbles but does not detectably alter ensemble replication kinetics or  
203 replication bubble growth monitored in single-molecule assays. Fen1-KikGR fluorescence was  
204 detected using 488-nm laser (Loveland et al., 2012).

205

## 206 **Histone dynamics during DNA licensing – Differential exchange kinetics of H2A/H2B versus H3/H4**

207 We first investigated histone dynamics during DNA licensing (Figure 3 and Videos 3–7). HSS was  
208 introduced into the flow cell containing immobilized fluorescently-labelled  $\lambda$  nucleosomes at a low  
209 flow rate over 2.5 minutes. As the extract slowly reached  $\lambda$  nucleosomes, thermal fluctuations of  
210 individual molecules become gradually reduced in comparison to egg lysis buffer (ELB) conditions. We  
211 rationalized that this is due to the immobilized DNA being bound by extract proteins, including native  
212 histones. Further chromatinization in extracts also brought stretched  $\lambda$  DNA molecules closer to the  
213 surface resulting in an initial increase in the histone fluorescence intensity (Figure S1A). Thus, to obtain  
214 reliable data on histone dynamics in HSS, we imaged histones in real time between 3 and 14 min of  
215 incubation, under no flow conditions and after the initial changes in molecule mobility and  
216 fluorescence intensity.

217 Figures 3B and 3C show kymograms and corresponding fluorescence traces for  $\lambda$  nucleosomes  
218 containing H2A-K119<sup>Cy5</sup>, H2B-T112C<sup>A647</sup>, H3-K36C<sup>Cy5</sup>, H3-T80C<sup>A647</sup> and H4-E63C<sup>A647</sup>. We found that all  
219 analyzed fluorescent histones show limited lateral dynamics; i.e. their movement along the DNA  
220 molecule is largely confined within the spatiotemporal resolution of our approach. While there was  
221 some local drift of histone fluorescence from the starting position, we never observed long-distance  
222 lateral movement for any of the histones tested in our assay. The dominant dynamic behavior

223 observed during the HSS incubation is the gradual loss of histone-associated fluorescence over time.  
224 Interestingly, in the case of H2A-K119<sup>Cy5</sup> and H2B-T112C<sup>A647</sup> (Figure 3B, Videos 3 and 4) the decrease  
225 in histone fluorescence signal was greater than for H3-K36C<sup>Cy5</sup>, H3-T80C<sup>A647</sup> and H4-E63C<sup>A647</sup> (Figure  
226 3C, Videos 5, 6 and 7). We quantified the average rate of histone fluorescence decay for each template  
227 (Figures 3D, 3E and S1B, and Table S2) and found that histones H3 and H4 have approximately three-  
228 times longer half-lives in HSS than H2A and H2B.

229 The observed loss of histone fluorescence is likely to result from three phenomena: (i)  
230 photobleaching of the dye, (ii) nucleosome eviction and (iii) fluorescent histone exchange within a  
231 nucleosome with an unlabelled native counterpart from the extract. Given that the same type of dye  
232 was used to track histones displaying different kinetic behavior (e.g. H2B-T112C<sup>A647</sup> and H4-E63C<sup>A647</sup>;  
233 half-lives: 201.0 and 741.2 s<sup>-1</sup>, respectively) and that histone H3 labelled with two different dyes  
234 showed similar rate of fluorescence decay (H3-K36C<sup>Cy5</sup> and H3-T80C<sup>A647</sup>; half-lives: 775.0 and 603.8  
235 s<sup>-1</sup>, respectively), we conclude that photobleaching itself cannot account for the observed kinetic  
236 differences between H2A/H2B and H3/H4. We also rationalized that nucleosome eviction would affect  
237 the fluorescence signal in the same way, regardless of the histone type, as all four histones would  
238 simultaneously dissociate from the DNA. Hence, we conclude that the observed difference in the loss  
239 of fluorescence between H2A/H2B and H3/H4 predominantly reflects different exchange rates with  
240 native histones, present in HSS at a concentration of ~1-6 μM (Figure S1C). The faster displacement  
241 rate for histones H2A and H2B relative to H3 and H4 in *Xenopus* extracts is consistent with previous  
242 reports indicating greater lability of H2A-H2B within nucleosomes *in vivo* (Annunziato, 2013; Jackson,  
243 1990; Kimura and Cook, 2001; Louters and Chalkley, 1985) and could potentially reflect the structural  
244 organization of the histone octamer, where the two H2A-H2B dimers are more accessible than the  
245 core (H3-H4)<sub>2</sub> hetero-tetramer (Figure 1A).

246

### 247 **Replication of fluorescent nucleosomal templates**

248 To investigate the dynamics of parental histones during DNA replication, we initiated replication of  
249 the stretched and licensed fluorescent nucleosomal λ templates by introducing NPE containing Fen1-  
250 KikGR (Figure 3A). After one or two origins per template had fired, the NPE mix was replaced with NPE  
251 supplemented with p27<sup>Kip</sup> to prevent further origin firing. This procedure allowed us to follow the  
252 growth of individual replication bubbles in real time, and hence to determine the outcome of collision  
253 between a single progressing replication fork with nucleosomes on its path. We anticipated that as  
254 long as fluorescent nucleosomes are sparsely distributed along the stretched DNA molecules (i.e. a  
255 few fluorescent nucleosomes per DNA molecule), we would be able to distinguish individual fork-  
256 nucleosome collision events.



257 We first examined whether replication of nucleosomal  $\lambda$  templates is as efficient as that of  
258 naked  $\lambda$ . To this end, we measured the mean replication fork velocity for naked  $\lambda$ , as well as WT and  
259 fluorescent nucleosomes on  $\lambda$  DNA. For all templates, the replication forks travelled at a similar mean  
260 velocity of approximately 640 nt/min (Figure S2A and S2B), indicating that neither the reconstituted  
261 nucleosomes nor the fluorophores they carry affect fork progression. Forks fired on similar time scales  
262 for naked DNA and low density nucleosomal templates; between 5 and 12 min from the moment of  
263 NPE introduction. In addition, we compared the efficiency of replication using ensemble assays, in  
264 which naked plasmid and plasmid containing fluorescent nucleosomes were replicated under  
265 unrestricted firing conditions in *Xenopus* egg extracts. We found that chromatinized plasmids  
266 replicated as efficiently as their naked counterpart (Figure S2C). We conclude that our nucleosomal  
267  $\lambda$  templates and microfluidics-based replication assays provide an appropriate imaging platform for  
268 tracking the fate of parental histones during replication.

269

### 270 **Heterogenous dynamics of parental histones upon replication fork arrival**

271 The primary goal of this study was to determine the outcome of replication fork encounters with  
272 parental nucleosomes by using our real-time single-molecule imaging platform. Based on the  
273 literature, we envisioned four possible collision scenarios, all of which would give us a characteristic  
274 kymogram footprint (Figure 4; schematics). These included nucleosome (histone) eviction, localized  
275 parental histone transfer onto daughter strands, nucleosome (histone) sliding ahead of the replication  
276 fork and replication fork stalling. We focused our studies on low nucleosome density  $\lambda$  templates  
277 containing either H3-K36C<sup>Cy5</sup> or H4-E63C<sup>A647</sup>, due to their high fluorophore labelling efficiency and  
278 lower exchange rates, compared to H2A-H2B, during licensing in HSS. We observed all of these events  
279 in our experiments (Figures 4 and S3).

280 Nucleosome (histone) eviction is emblematic of nucleosome disassembly prior to DNA  
281 unwinding and synthesis, resulting in parental histone release into the pool of free histones. It is  
282 manifested in the kymograms and accompanying videos by the loss of histone fluorescence at the  
283 point of encounter with the replication fork (Figure 4A, Video 8 and Figure S3A). In the case of  
284 nucleosome (histone) transfer, the histone-associated fluorescence is incorporated into the Fen1-  
285 KikGR-decorated track of nascent DNA upon passage of the replication fork (Figure 4B, Video 9 and  
286 Figure S3B). This characteristic illustrates localized parental histone recycling, a mechanism whereby  
287 the fluorescent histone from disassembled parental nucleosome stays in the vicinity of the replisome  
288 and is immediately re-deposited into a nucleosome on daughter DNA. The resolution of our technique  
289 is approximately 1 kilobase pair, and so it does not allow us to specify if histones are reinstated at the  
290 exact same locus within the replicated DNA. The third type of event, which we classify as nucleosome

291 or histone sliding, is detected as a continuous movement of histone fluorescence signal with a tip of  
292 the replication bubble from the moment of nucleosome-fork encounter (Figure 4C, Video 10 and  
293 Figure S3C). This sliding behavior is likely indicative of two molecular phenomena, which at present  
294 cannot be distinguished. One possibility is that the whole nucleosome is being pushed ahead of the  
295 replication fork, as observed for nucleosome remodelers (Bowman, 2010). Alternatively, the  
296 nucleosome is disassembled at the point of fork collision, the fluorescent histone then associates with  
297 the replisome and travels with it along the DNA. Sliding typically occurs over short distances (within a  
298 few kilobase pairs) but occasionally we observed nucleosome/histone push on a scale of 25 – 30  
299 kilobase pairs, spanning over a half of the length of  $\lambda$  DNA (48.5 kbp). Replication fork stalling upon  
300 collision with a nucleosome is exemplified in our experiments by a static histone fluorescence next to  
301 an arrested tip of the replication bubble (Figure 4D, Video 11 and Figure S3D). In this scenario, the  
302 nucleosome acts as a roadblock preventing the replication fork from further movement.

303 Nucleosome eviction and localized histone transfer are the two ultimate outcomes of  
304 replication fork encounter with nucleosomes as, once they have occurred, the fork and nucleosome  
305 (histone) are no longer in contact/proximity. In contrast, nucleosome/histone sliding and replication  
306 fork stalling preserve the fork-nucleosome/histone ‘interaction’, and hence often lead to secondary  
307 outcomes (Figure 5). Both sliding and stalling can terminate in nucleosome/histone eviction (Figures  
308 5A and 5B, and Videos 12 and 13, respectively) as well as histone transfer behind the replication fork  
309 (Figures 5C and 5D, and Videos 14 and 15, respectively). In addition, nucleosome/histone sliding can  
310 result in replication fork stalling (Figure 5E and Video 16) and vice versa (Figure 5F and Video 17).  
311 Occasionally, we observe tertiary events; for example, fork stalling followed by nucleosome/histone  
312 sliding leads to a second fork stalling (Figure 5F, note that the second fork stalling event is unmarked)  
313 or nucleosome/histone sliding followed by fork stalling terminates in histone transfer (Figure S6D;  
314 note that fork stalling and histone transfer are unmarked).

315

### 316 **Parental histone eviction is the dominant outcome of replication fork encounter with nucleosomes** 317 **in *Xenopus* egg extracts**

318 To gain further insight into the mechanism of chromatin replication, we quantified the probability of  
319 different outcomes of fork-nucleosome encounter in *Xenopus* egg extracts (Figures 6A and 6B; left  
320 panels). Contrary to our expectations, for both tested nucleosomal templates, containing either H4-  
321 E63C<sup>A647</sup> or H3-K36C<sup>Cy5</sup>, the dominant event was nucleosome eviction at 40.2% and 49.1%,  
322 respectively. Parental histone recycling, the event we anticipated to be the most frequent, occurred  
323 at significantly lower frequency, 15.4% for H4-E63C<sup>A647</sup> nucleosomes (the rarest event of all) and 17.3%  
324 in the case of nucleosomes carrying H3-K36C<sup>Cy5</sup>. Nucleosome/histone sliding was more prevalent on

325 templates with H4-E63C<sup>A647</sup> nucleosomes (27.4%) than H3-K36C<sup>Cy5</sup> (19.1%) however, in both cases, it  
326 represented the second most probable outcome of replication fork collision with nucleosomes.  
327 Replication forks stalled on nucleosomes in 16.9% of cases for H4-E63C<sup>A647</sup> and 14.5% for H3-K36C<sup>Cy5</sup>.

328 In the light of this surprisingly inefficient parental histone recycling at the replication fork, we  
329 next wanted to test whether DNA stretching could influence the outcome of nucleosome-fork  
330 collision. It is plausible that, if a specific three-dimensional fork-replisome structure is needed for  
331 efficient parental histone transfer onto daughter strands, the double-tethering of nucleosomal  
332 templates (stretched to ~70% of the maximum contour length) could potentially impede longer-range  
333 DNA contacts and histone recycling. To address this issue, we performed single-molecule replication  
334 experiments, in which approximately 50% of the immobilized nucleosomal  $\lambda$  molecules were tethered  
335 to the surface at only one end, and so were free to fold in three-dimensional space, unlike their  
336 doubly-tethered counterparts (Figure S4). Singly-tethered molecules in extracts appear as a  
337 diffraction-limited spot of fluorescence, which does not stretch under flow of native buffers, making  
338 it impossible to visualize individual fork collisions with nucleosomes. Hence, we compared the loss of  
339 histone-associated fluorescence between singly- and doubly-tethered nucleosomal templates as a  
340 proxy for determining the effect of DNA stretching on parental histone retention during replication.  
341 We found no difference in the rate of histone loss or daughter strand synthesis (as measured by the  
342 increase of the Fen1-KikGR signal) between the two templates (Figures S4D and S4E). Based on these  
343 observations we conclude that DNA stretching does not cause excessive histone eviction during  
344 replication in *Xenopus* egg extracts.

345 Another potential cause of inefficient histone recycling at the replication fork in our system  
346 could be the retention of Fen1-KikGR on nascent DNA. To test whether this is the case, we conducted  
347 single-molecule replication experiments on doubly-tethered fluorescent  $\lambda$  nucleosomes in extracts  
348 supplemented with digoxigenin-dUTP (dig-dUTP), instead of Fen1-KikGR (Figure S5). Incorporation of  
349 dig-dUTP into nascent DNA does not allow us to track the growth of replication bubbles in real time  
350 but it enables their post-replication visualization through immunostaining with fluorescein-labelled  
351 anti-digoxigenin antibody (anti-dig Ab<sup>Fluor</sup>). We combined three modes of detection after replication  
352 (nucleosomes – H3-K36C<sup>Cy5</sup>, nascent DNA – anti-dig Ab<sup>Fluor</sup>, all DNA – SYTOX Orange) and found that  
353 the replicated tracts of  $\lambda$  DNA were largely free of H3-K36C<sup>Cy5</sup> signal, whereas the non-replicated  
354  $\lambda$  regions remained decorated with H3-K36C<sup>Cy5</sup>-nucleosomes (Figure S5B). These results further  
355 confirm that histone recycling is highly inefficient during replication in *Xenopus* egg extracts and lead  
356 us to conclude that Fen1-KikGR does not interfere with histone transfer onto daughter strands.

357

358

### 359 **Efficiency of parental histone transfer depends on the concentration of free histones**

360 In *Xenopus leavis* embryos, transcription is activated in the thirteenth cell cycle (Newport and  
361 Kirschner, 1982). Until this point, the embryonic genome is transcriptionally silent, and so the oocyte  
362 must provide histones in sufficient abundance to support the initial twelve rounds of replication after  
363 fertilization (Woodland et al., 1979). *Xenopus* egg extracts must therefore contain a high proportion  
364 of free histones; at least  $2^{12}$  times higher than an equivalent extract of somatic cells. Thus, we set out  
365 to determine whether the probabilities of the four outcomes of fork-nucleosome encounter would be  
366 different in extracts containing less histones.

367 We estimated the concentration of histones in our replication-promoting extracts by Western  
368 blots as approximately 10 and 20  $\mu\text{M}$  for H4 and H3, respectively (Figures 6C and 6D). Newly  
369 synthesized histone H4 is acetylated at lysine 12 (H4-K12Ac) and forms a pre-deposition complex with  
370 histone H3 (Verreault et al., 1998). We depleted extracts of histone H4, using an antibody recognising  
371 H4-K12Ac (Zierhut et al., 2014), to less than 10% of its normal content; estimated concentration of H4  
372 in depleted extracts is  $\sim 1 \mu\text{M}$  (Figure 6C). This procedure also led to co-depletion of histone H3 from  
373 extracts and reduced its concentration to  $\sim 5 \mu\text{M}$  (equivalent to 25% of its normal content; Figure 6D).  
374 We next performed single-molecule replication assays on doubly-tethered  $\lambda$  nucleosomes, containing  
375 either H4-E63C<sup>A647</sup> or H3-K36C<sup>Cy5</sup>, in extracts depleted of histones H4 and H3. For both templates, we  
376 observed a reduction in the mean replication fork velocity relative to regular extracts (565 nt/min  
377 from 638 nt/min for H4-E63C<sup>A647</sup> and 523 nt/min from 635 nt/min for H3-K36C<sup>Cy5</sup>; Figures 6E and 6F).  
378 Based on the observation that H4/H3-depleted extracts contain less histone chaperone Asf1 ( $\sim 25\%$   
379 less than in undepleted extracts; Figure S6A), we rationalized that the observed reduction in the  
380 replication fork rates might reflect changes in the histone-to-chaperone ratio. The four principal  
381 outcomes of fork-nucleosome encounter were still detected in depleted extracts (Figures S6B-E) but  
382 the probability of collision outcomes was different (Figures 6A and 6B; central panels), in particular,  
383 regarding parental histone transfer and nucleosome eviction (Figures 6H and 6I). In stark contrast to  
384 regular extracts, the dominant event in histone-depleted extracts was localized histone transfer,  
385 detected in 50% of collisions for both H4-E63C<sup>A647</sup> and H3-K36C<sup>Cy5</sup>  $\lambda$  nucleosomes. This increased  
386 efficiency of histone recycling was accompanied by a dramatic drop in the frequency of  
387 nucleosome/histone eviction (18.9% for H4-E63C<sup>A647</sup> and 19.5% for H3-K36C<sup>Cy5</sup>), whereas  
388 nucleosome/histone sliding and replication fork stalling were observed at similar probability levels to  
389 those found in undepleted extracts. We also observed a higher probability of secondary transfer  
390 events (i.e. slide-transfer and stall-transfer), when compared to regular extracts (Figures 6H, 6I and  
391 S7).

392           Given the lower mean replication fork velocity in extracts depleted of histones H4 and H3, we  
393 next investigated whether the observed increase in localized histone transfer is due to slower  
394 replication forks. If that was the case, in regular undepleted extracts, the mean velocity of forks  
395 leading to histone transfer upon collision with nucleosomes would be lower than for forks prompting  
396 nucleosome eviction. We compared replication fork velocities leading to different outcomes upon  
397 nucleosome-fork encounter in regular extracts and detected no such difference (Figure 6G). Indeed,  
398 we found no correlation between replication fork speed and any of the nucleosomal outcomes evident  
399 during replication in extracts.

400           Our results strongly suggest that excess provision of free histones during replication, as found  
401 in *Xenopus* egg extracts, leads to impaired localized histone recycling. We further tested this  
402 hypothesis by performing single-molecule replication assays in extracts depleted of the free  
403 endogenous histones (as described above) but supplemented with recombinant histones H4 and H3  
404 to native concentrations (Figures 6C and 6D). If our model is correct, the presence of recombinant  
405 histones should counteract the H4(H3) depletion effect and mimic the behavior of regular undepleted  
406 extracts. We replicated nucleosomal templates containing either H4-E63C<sup>A647</sup> or H3-K36C<sup>Cy5</sup> and  
407 detected a slight reduction in the mean replication fork velocity, in comparison to depleted extracts  
408 (484 nt/min from 565 nt/min for H4-E63C<sup>A647</sup> and 514 nt/min from 523 nt/min for H3-K36C<sup>Cy5</sup>; Figures  
409 6E and 6F). Next, we quantified the probability of different fork-nucleosome encounter outcomes in  
410 depleted extracts supplemented with recombinant histones (Figures 6A and 6B; right panels; and  
411 Figure S8). Consistent with our predictions, we found reduced levels of histone transfer (21.0% for H4-  
412 E63C<sup>A647</sup> and 27.2% for H3-K36C<sup>Cy5</sup>) and higher frequency nucleosome/histone eviction events (34.1%  
413 for H4-E63C<sup>A647</sup> and 26.2% for H3-K36C<sup>Cy5</sup>), relative to histone depleted extracts (Figures 6A, 6B, 6H  
414 and 6I). A similar trend was also observed for secondary transfer and eviction events (Figures 6H, 6I  
415 and S7); i.e. events following initial slide and stall. In the case of H4-E63C<sup>A647</sup>  $\lambda$  nucleosomes,  
416 nucleosome/histone sliding and replication fork stalling were detected at similar probability levels to  
417 those found in regular and undepleted extracts (Figures 6A and 6H). We note that for  $\lambda$  nucleosomes  
418 containing H3-K36C<sup>Cy5</sup> (Figures 6B and 6I) these two events were found at a slightly higher frequency  
419 than previously detected for regular and undepleted extracts. Based on these data, we conclude that  
420 the efficiency of localized histone recycling at the replication fork depends on the concentration of  
421 soluble histones.

422

## 423 **DISCUSSION**

424 Chromatin domains and their constituent histones with specific PTMs define the transcriptional  
425 program of the cell, and hence must be faithfully replicated through cell division. During replication

426 chromatin undergoes a complete nucleosome-by-nucleosome disassembly, followed by restoration  
427 of chromatin structures on the daughter strands. Due to the dynamic and multi-component nature of  
428 chromatin replication, the molecular mechanisms that govern nucleosome disassembly and parental  
429 histone transfer remain poorly characterized. In this work, we devised a real-time single-molecule  
430 imaging platform to determine the fate of parental nucleosomes and their constituent histones upon  
431 encounter with progressing replication forks. Our approach enables visualization of individual  
432 nucleosome-fork collisions during replication in *Xenopus* egg extracts, and thus allowed us to unravel  
433 the mechanistic detail of chromatin replication at an unprecedented spatiotemporal resolution.  
434 Broader implications and significance of our findings are discussed below.

435

### 436 **Implications of heterogeneous parental histone dynamics upon collision with the replication fork**

437 The current consensus model for replication-coupled parental histone transfer suggests that (i) most  
438 if not all parental histones are recycled at the replication fork (Alabert et al., 2015), (ii) parental  
439 histones are quickly deposited onto nascent DNA and are equally distributed between the leading and  
440 lagging strands (Annunziato, 2013, 2015; Petryk et al., 2018; Yu et al., 2018), (iii) parental histones are  
441 recycled with their specific PTMs (Alabert et al., 2015), and (iv) that genomic localization of parental  
442 histones is preserved on daughter strands (Reveron-Gomez et al., 2018). Most of these pioneering  
443 studies are based on tailored ChIP-Seq and proteomics approaches that, while yielding important  
444 insights into replication-coupled chromatin restoration in bulk, inevitably, average out any  
445 inhomogeneities. They also do not provide crucial information on time-resolved parental histone  
446 dynamics, since they compare only pre- and post-replicated states of chromatin. Our single-molecule  
447 nucleosome imaging methodology offers a complimentary tool to study chromatin dynamics, as it  
448 focuses on individual parental histones, tracks them through the entire process of DNA replication in  
449 real time, and thus unravels their intricate kinetic behavior.

450 Through the use of this approach, we managed to demonstrate that, contrary to the prevailing  
451 view, replication fork collision with nucleosomes does not always result in an instant parental histone  
452 transfer onto daughter strand (Figures 4 and 5; we note that at present our experiments do not allow  
453 us to determine whether a physical collision actually takes place between the replisome and  
454 nucleosomes). In fact, three additional outcomes are possible: nucleosome/histone eviction,  
455 nucleosome/histone sliding and replication fork stalling. While nucleosome/histone eviction  
456 undoubtedly represents parental nucleosome disassembly, the very first step on the possible histone  
457 recycling trajectory, the latter two cases have not been observed before for nucleosome-fork  
458 encounter. Nucleosome/parental histone sliding has two equally probable molecular explanations  
459 that, as yet, we cannot distinguish; either a whole nucleosome is pushed ahead of the replication fork

460 or an evicted parental histone is ‘piggybacking’ on the replisome. The ‘piggybacking’ mechanism is  
461 particularly interesting since, if true, it would represent the second intermediate step on the histone  
462 transfer pathway, whereby released parental histones are ushered to daughter strands via a series of  
463 interactions facilitated by histone chaperones and replisome components, such as FACT, MCM2, Ctf4  
464 or Pol $\alpha$  (Gan et al., 2018; Kurat et al., 2017). Further studies are needed to identify the underlying  
465 molecular basis for the observed sliding behavior.

466 Replication fork stalling upon collision with a nucleosome has an obvious molecular  
467 interpretation – a nucleosome constitutes a roadblock and stops progression of the replisome. Indeed,  
468 other DNA-binding proteins can lead to fork stalling in egg extracts (Kose et al., 2019). Fork stalling is  
469 a transient state that, in most cases, terminates in nucleosome eviction or parental histone recycling.  
470 Persistent stalling events (i.e. when replication fork never restarts on the experimental time scale)  
471 typically occur when the nucleosome is located at the very end of  $\lambda$  DNA. Because the DNA molecules  
472 in our assays are of finite length (48.5 kbp), the likelihood of finding an end-point nucleosome is much  
473 higher than for longer DNA, and so the proportion of persistent stalling events in our quantifications  
474 must be an overestimate. In addition, at present, we cannot draw any definitive conclusions as to  
475 what makes some nucleosomes more difficult to disassemble ahead of the replication fork particularly  
476 since the molecular basis for nucleosome ejection remains to be identified.

477

#### 478 **Role of newly synthesized histones in parental histone recycling**

479 To maintain correct nucleosome density on the replicated daughter DNA strands, nucleosomes are  
480 assembled from the pool of recycled parental histones and newly synthesized histones. Assuming that  
481 all parental histones are reinstated during replication, an equal amount of newly synthesized histones  
482 needs to be delivered into the nucleus to restore chromatin structure. This high demand for canonical  
483 core histones during S phase is fulfilled through rapid expression of multicopy histone genes, induced  
484 at the onset of replication and tightly regulated throughout the cell cycle (Marzluff et al., 2008).  
485 Because histones are highly basic proteins, and so have the potential to bind non-specifically to  
486 negatively charged macromolecules, such as DNA and RNA, they are escorted throughout their cellular  
487 life by dedicated networks of chaperone proteins (Gurard-Levin et al., 2014). Histone chaperones  
488 ensure their correct folding, control their traffic within the cell (such as nuclear import, nucleosome  
489 assembly and histone degradation) and assist nucleosome dynamics. The deficit or excess of canonical  
490 histones was found to inhibit DNA replication and lead to genomic instability in yeast and mammalian  
491 cells (Groth et al., 2007; Gunjan and Verreault, 2003; Han et al., 1987; Kim et al., 1988; Mejlvang et  
492 al., 2014; Nelson et al., 2002).

493 *Xenopus* eggs naturally contain high amounts of histones because they need to support the  
494 first twelve rounds of DNA replication prior to the midblastula transition, when transcription is  
495 initiated (Newport and Kirschner, 1982). Consequently, egg extracts have a significantly higher  
496 concentration of ‘free’ histones than an equivalent extract of somatic cells. The quantitative analysis  
497 of the replication fork collision with nucleosomes in these extracts revealed that nucleosome/histone  
498 eviction is the dominant outcome, approximately three times more likely than parental histone  
499 transfer (Figure 6). Interestingly, extracts depleted of a large proportion of newly synthesized histones  
500 promoted efficient parental histone recycling, increasing its likelihood to ~3:1 over histone eviction.  
501 Supplementation of depleted extracts with recombinant histones reversed this effect, resulting in  
502 nucleosome/histone eviction prevalence over localized histone transfer, at ~2:1 likelihood ratio.

503 Our analysis clearly demonstrates that the efficiency of localized parental histone recycling  
504 depends on the concentration of newly synthesized histones. We interpret these results with the  
505 following molecular model (Figure 7). At low concentrations of free histones, the majority of parental  
506 histones is locally recycled. Upon nucleosome disassembly ahead of the replication fork, parental  
507 histones are released from the DNA and remain in the vicinity of the replisome, through a concerted  
508 action of histone chaperones and replisome components, which finally deposit parental histones on  
509 the daughter DNA. When the concentration of newly synthesized histones is high, most parental  
510 histones are released into the milieu and do not get incorporated into replicated DNA. The most  
511 probable explanation for such behavior is that the free histones exchange with their parental  
512 counterparts *en route* from parental to nascent DNA. Although less likely, we cannot rule out the  
513 possibility that the pathway of newly synthesized histone deposition takes over in conditions of  
514 excessive histone provision and inhibits localized parental histone recycling.

515

### 516 **Consequences for epigenetic inheritance**

517 Epigenetic changes are heritable alterations to gene expression profiles occurring without  
518 modifications to the primary structure of DNA. Chromatin is divided into domains that either facilitate  
519 transcription (euchromatin or open chromatin) or repress it (heterochromatin or compacted/closed  
520 chromatin). Nucleosomes in eu- and heterochromatin carry specific histone PTMs, which modulate  
521 the structure and dynamics of these chromatin structures (Stillman, 2018). Thus, in order to maintain  
522 the transcriptional program of the cell, chromatin structures and their associated histone PTMs, must  
523 be faithfully transmitted to daughter cells, through a process generally referred to as epigenetic  
524 inheritance. The key question in the field of epigenetics is whether localized parental histone recycling  
525 at the replication fork drives the transgenerational transmission of PTMs.



526 Through the use of ChOR-seq (chromatin occupancy after replication) in HeLa cells, it was  
527 recently reported that accurate parental histone redeposition preserves positional information and  
528 allows PTM transmission to daughter cells (Reveron-Gomez et al., 2018). This behavior was observed  
529 for histone modifications marking transcriptionally active chromatin (tri-methylation of histone H3 at  
530 lysine 4, lysine 36 and lysine 79; H3-K4me3, H3-K36me3 and H3-K79me3, respectively) as well as  
531 transcriptionally silent chromatin (tri-methylation of histone H3 at lysine 27, H3-K27me3).  
532 Interestingly, microscopic tracking of parental histone H3 variants through cell division in HeLa cells  
533 (Clement et al., 2018) demonstrated that H3.3, marking early-replicating chromatin (known to be  
534 transcriptionally active), was lost at a faster rate than H3.1, which is associated with late-replicating  
535 chromatin (characteristic of transcriptionally repressed domains) (Rhind and Gilbert, 2013).  
536 Furthermore, a locus-specific, proximity-dependent histone labelling-based study in mouse  
537 embryonic stem cells has revealed that only the repressed chromatin domains are preserved through  
538 local recycling of parental histones (Escobar et al., 2019). In the case of active chromatin, the local  
539 redeposition of parental histones was absent in this study, leading the authors to suggest that the  
540 associated histone PTMs are not epigenetic and function solely to facilitate transcription. Indeed, the  
541 concept that PTMs can be epigenetically inherited through localized histone recycling originated from  
542 studies of tri-methylation of histone H3 on lysine 9 (H3-K9me3) and lysine 27 (H3-K27me3), which are  
543 associated with constitutive and facultative heterochromatin, respectively (Reinberg and Vales, 2018).  
544 The model suggests that these PTMs segregate to daughter strands during DNA replication, producing  
545 a landscape where nucleosomes containing parental histones with the PTMs are adjacent to naïve  
546 nucleosomes, composed of newly synthesized histones. The protein machineries responsible for  
547 depositing H3-K9me3 and H3-K27me3 operate by using a specific ‘read and write’ mechanism,  
548 whereby they first bind to the existing PTM on a recycled parental histone, which in turn stimulates  
549 the modification of neighboring naïve nucleosomes. The ‘read and write’ mechanism ensures that  
550 repressive chromatin domains are efficiently reestablished in daughter cells.

551 Therefore, a major question in the field is what molecular mechanism could lead to different  
552 patterns of parental histone recycling at the replication fork for eu- and heterochromatin. A possible  
553 explanation is that there are PTM-specific chaperones directing parental histones either for local  
554 transfer onto daughter strands (in the case of PTMs associated with heterochromatin) or into the pool  
555 of soluble histones (in the case of PTMs associated with euchromatin). This model however seems  
556 unlikely given that histones without any posttranslational modifications were found to efficiently  
557 transfer onto daughter strands in a replication system reconstituted from yeast purified proteins (in  
558 the absence of soluble histones) (Kurat et al., 2017). Another reason for the observed discrepancy in  
559 local histone conservation between transcriptionally active and repressed chromatin could be the rate

560 of replication, known to be faster for early-replicating euchromatin than late-replicating  
561 heterochromatin (Rhind and Gilbert, 2013). Our analysis of the replication fork collision with  
562 nucleosomes shows that the velocity of the progressing replication fork has no influence on the  
563 collision outcome (Figure 6G), rendering this explanation less probable. Based on our findings that the  
564 efficiency of parental histone transfer depends on the concentration of newly synthesized histones  
565 (Figures 6 and 7), we propose an alternative molecular mechanism for the selective epigenetic  
566 conservation across chromatin domains in which differential levels of accessible free histones are used  
567 to prevent local histone recycling in euchromatin but promote it in heterochromatic regions. Rapid  
568 histone biosynthesis is activated at the beginning of S phase and persists at high levels until the end  
569 of S phase, when DNA replication is halted (Marzluff et al., 2008). Transcriptionally active and silenced  
570 chromatin domains display distinct spatial segregation in the nucleus (Bonev and Cavalli, 2016; Solovei  
571 et al., 2016; van Steensel and Belmont, 2017) and their replication is separated in time. Recent studies  
572 show that associations between heterochromatic regions, most likely driven by HP1 $\alpha$  (Larson et al.,  
573 2017; Strom et al., 2017), lead to phase separation of active and repressed chromatin, whereas  
574 euchromatic interactions are dispensable for compartmentalization (Falk et al., 2019). We speculate  
575 that the phase boundary could act as a selective barrier to histones and/or the associated chaperones,  
576 and thus provide distinct regions of histone accessibility within the nucleus during replication. Phase  
577 separated heterochromatin domains would replicate under conditions of limited provision of newly  
578 synthesized histones, ensuring efficient localized parental histone transfer at the replication fork, and  
579 so its epigenetic inheritance. In the case of transcriptionally active euchromatin, the high local  
580 concentration of newly synthesized histones would lead to dispersed redistribution of parental and  
581 newly synthesized histones on daughter strands.  
582

583 **ACKNOWLEDGEMENTS**

584 We thank Daniel Maskell for H3-K36C histone octamer. We thank Johannes Walter for pET28-Fen1-  
585 KikGR plasmid, and Gheorghe Chistol and Livio Dukaj for helpful discussions on Fen1-KikGR  
586 experiments. We thank Hironori Funabiki and Christian Zierhut for advice on histone depletion from  
587 *Xenopus* egg extracts. We thank Geneviève Almouzni for anti-Asf1 antibody. This work was  
588 supported by the Francis Crick Institute, which receives its core funding from Cancer Research UK  
589 (FC001221), the UK Medical Research Council (FC001221), and the Wellcome Trust (FC001221). H.K.  
590 was supported by JSPS (JP17H01417, and JP18H05527) and JST-CREST (JPMJCR16G1).

591

592 **AUTHOR CONTRIBUTIONS**

593 D.T.G and H.Y. designed the experiments and prepared the manuscript. D.T.G. performed and  
594 analyzed the experiments. S.X. purified p27<sup>Kip</sup> and geminin. H.K. supplied anti-H4-K12Ac antibody.

595

596 **DECLARATION OF INTERESTS**

597 The authors declare no competing interests.

598

599 FIGURES

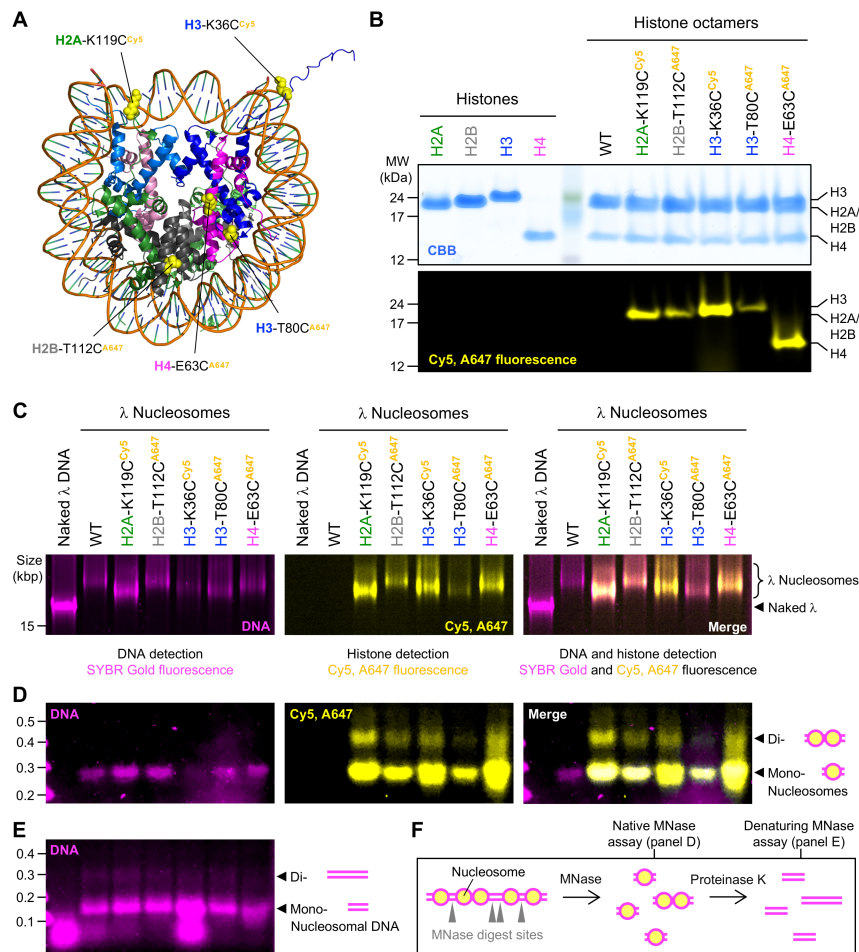

600

601 **Figure 1. Assembly of fluorescent nucleosomes on  $\lambda$  DNA.**

602 (A) Crystal structure of the *Xenopus* nucleosome (PDB 1AOI) illustrating the location and type of  
 603 fluorescent dye (Cy5 or AlexaFluor647 – abbreviated as A647) used to label histones. Histones are  
 604 color-coded (H2A – green, H2B – grey, H3 – blue and H4 – magenta) and the two chains of the same  
 605 histone type can be distinguished by different color shading. For clarity, only one of the two histones  
 606 of the same type is marked and labelled.

607 (B) SDS-PAGE analysis of wild-type (WT) and fluorescently-labelled histones and histone octamers.  
 608 Top panel shows Coomassie Brilliant Blue (CBB) staining whereas bottom panel illustrates  
 609 fluorescence signal of histones labelled with Cy5 or AlexaFluor647.

610 (C) Electrophoretic mobility shift assay (EMSA) for WT and fluorescently-labelled nucleosomes  
 611 reconstituted on  $\lambda$  DNA. Left panel shows SYBR Gold staining of the DNA (magenta), central panel  
 612 shows Cy5 and AlexaFluor647 fluorescence signal (yellow) of labelled histones and right panel is the  
 613 composite of both detection modes. Naked  $\lambda$  DNA (~48.5 kbp, first lane) migrates through 0.5 %  
 614 agarose faster than nucleosomal  $\lambda$  templates, containing either WT or fluorescently-labelled histones.

615 (D) Native micrococcal nuclease (MNase) protection assay for WT and fluorescently-labelled  
616 nucleosomes reconstituted on  $\lambda$  DNA. MNase preferentially digests unprotected DNA in linker regions  
617 between nucleosomes (see also panel F). Products of MNase digest were resolved in 1.5 % agarose  
618 under native conditions revealing intact mono- and di-nucleosomes for nucleosomal templates and  
619 complete digest of naked  $\lambda$  DNA (first lane). Signal detection as in panel C.

620 (E) Denaturing micrococcal nuclease (MNase) protection assay for WT and fluorescently-labelled  
621 nucleosomes reconstituted on  $\lambda$  DNA. Here, products of MNase digest were first deproteinated with  
622 proteinase K (see also panel F) in the presence of SDS and then resolved in 1.5 % agarose, yielding  
623 DNA fragments protected by mono- (~150 bp band) and di-nucleosomes (~300 bp band) for  
624 nucleosomal templates, and short (<100 bp) fragments for naked  $\lambda$  DNA (first lane).

625 (F) Schematic overview of native and denaturing MNase protection assays.

626

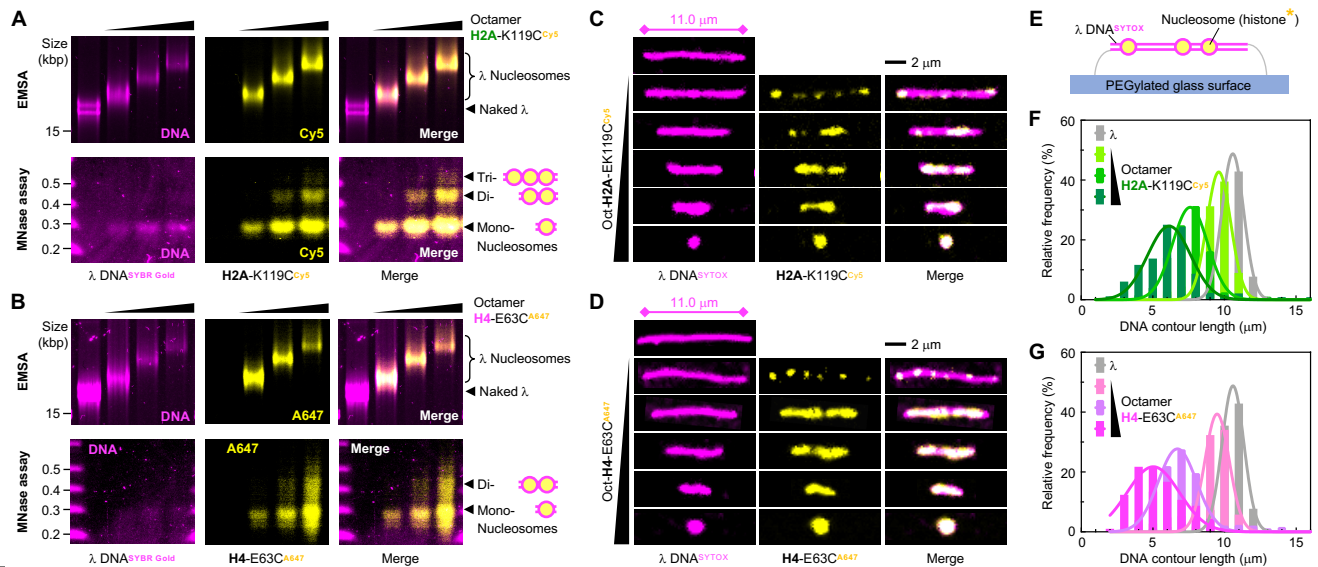

627

628 **Figure 2. Fluorescent nucleosomes on λ DNA are discretely distributed in a ‘beads-on-a-string’**  
 629 **manner.**

630 (A and B) Native EMSA (top) and MNase assay (bottom) for nucleosomes labelled at H2A-K119C with  
 631 Cy5 (A) and H4-E63C with AlexaFluor647 (B) reconstituted on λ DNA at increasing octamer:DNA ratios.  
 632 Left panels show SYBR Gold staining of the DNA (magenta), central panels show Cy5 and  
 633 AlexaFluor647 fluorescence signal (yellow) of labelled histones and right panels are the composites of  
 634 both detection modes. Deposition of increasing amounts of histone octamer on λ DNA leads to  
 635 gradual increase in the template size and slower migration through 0.5 % agarose in EMSA. The larger  
 636 the template size the slower the migration, as manifested by the more prominent shift of the DNA  
 637 band. The observed template size increase results from higher density of correctly folded  
 638 nucleosomes as indicated by the presence of mono-, di- and tri-nucleosomes in the corresponding  
 639 native MNase protection assays. The apparent loss of H4-E63C<sup>A647</sup> signal in EMSA is most likely due to  
 640 self-quenching of histone fluorescence, caused by structural arrangement of high-density  
 641 nucleosomes.

642 (C and D) Single-molecule imaging of nucleosomes labelled at H2A-K119C with Cy5 (C) and H4-E63C  
 643 with AlexaFluor647 (D) reconstituted on λ DNA at increasing nucleosome density. Left panels show  
 644 SYTOX Orange staining of the DNA (magenta), central panels show Cy5 and AlexaFluor647  
 645 fluorescence signal (yellow) of labelled histones and right panels are the composites of both detection  
 646 modes. For details of experimental set up see panel E. Fluorescent nucleosomes reconstituted on  
 647 λ DNA by salt dialysis show the characteristic ‘bead-on-a-string’ appearance. Nucleosome formation  
 648 on λ DNA leads to apparent shortening of the DNA template, consistent with its wrapping around the  
 649 octameric histone core.

650 (E) Schematic of the DNA immobilized in the microfluidic device for single-molecule imaging.  
651 Fluorescent nucleosomes are pre-assembled on  $\lambda$  DNA by salt dialysis. The nucleosomal DNA template  
652 is stretched under flow and doubly tethered to the PEGylated glass surface of the microfluidic device  
653 via biotin-streptavidin interactions. The imaging is carried out in TIRF mode using 561- and 640-nm  
654 lasers to visualize SYTOX Orange-stained DNA (magenta) and Cy5/AlexaFluor647-labelled histones  
655 (yellow), respectively.

656 (F and G) Single-molecule quantification of the DNA contour length for nucleosomes labelled at H2A-  
657 K119C with Cy5 (F) and H4-E63C with AlexaFluor647 (G) reconstituted on  $\lambda$  DNA at increasing  
658 octamer:DNA ratios. The four species presented on each graph correspond to the four samples shown  
659 in panels A and B. The DNA length of individual molecules was measured based on SYTOX Orange  
660 staining of the DNA (approximately 400 molecules at each histone octamer concentration). As  
661 illustrated in panels C and D, deposition of nucleosomes on  $\lambda$  DNA results in apparent shortening of  
662 the DNA template. The higher the octamer content in the reconstitution reaction, the shorter the  
663 mean DNA contour lengths and the broader the DNA length distributions were observed.

664

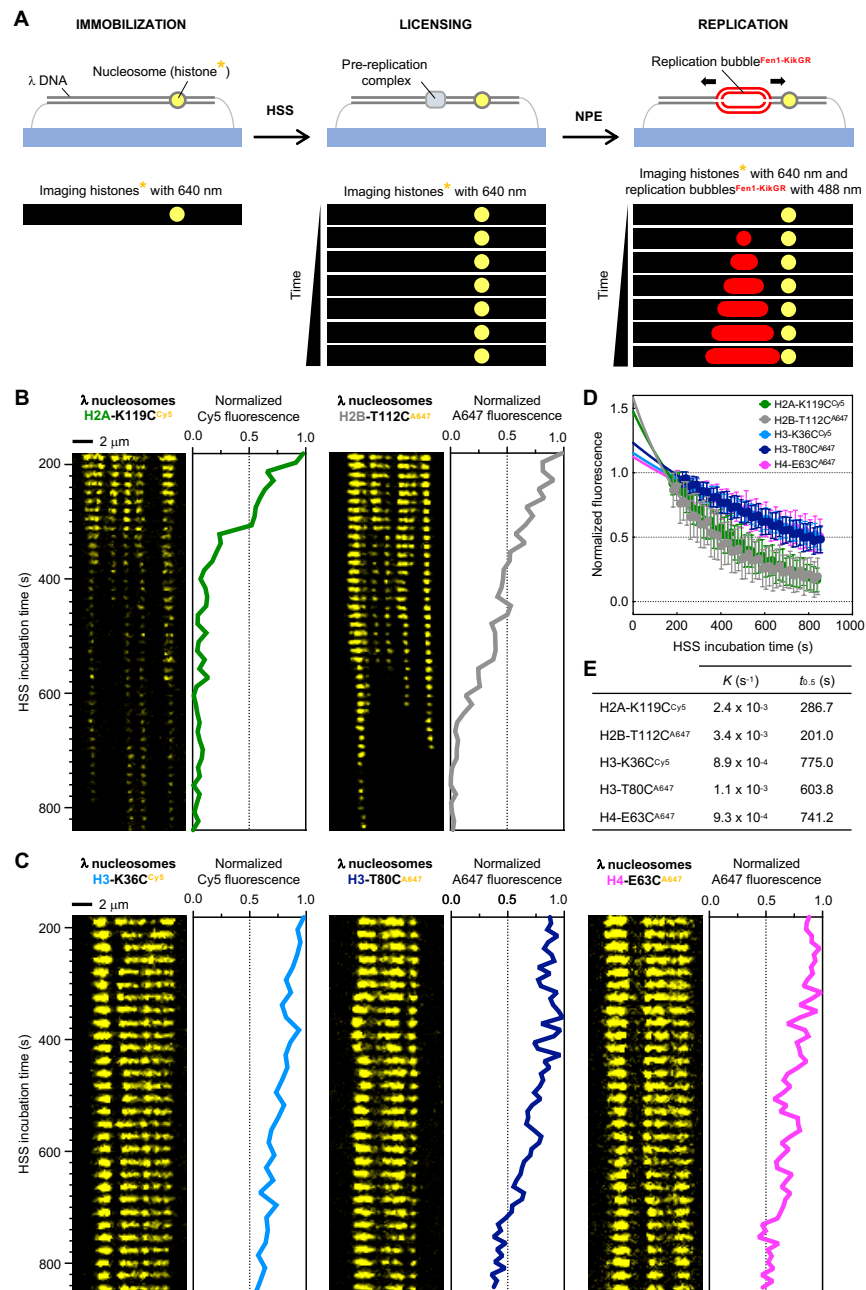

665

666 **Figure 3. Histone dynamics during DNA licensing in HSS.**

667 (A) Schematic of the experimental set-up for real-time single-molecule imaging of nucleosome  
 668 dynamics during replication in *Xenopus leavis* egg extracts.  $\lambda$  DNA containing fluorescent nucleosomes  
 669 (one of the four histones labelled fluorescently) is stretched under flow and tethered at both ends to  
 670 the functionalized glass surface of a microfluidic flow cell. The immobilized DNA is licensed in high-  
 671 speed supernatant (HSS). Bidirectional replication is initiated upon introduction of nucleoplasmic  
 672 extract (NPE) supplemented with a fluorescent fusion protein Fen1-KikGR, which decorates replication  
 673 bubbles and allows progression of replication forks to be tracked in real time. Cy5- or Alexa647-



674 labelled histones within immobilized nucleosomal templates are imaged with a 640-nm laser at each  
675 stage. Replication fork progression is visualized in NPE using a 488-nm laser.  
676 (B and C) Kymograms and corresponding intensity profiles for fluorescent  $\lambda$  nucleosomes during  
677 incubation in HSS. Nucleosomes labelled at H2A-K119C with Cy5 and H2B-T112C with AlexaFluor647  
678 (B) show faster loss of fluorescence than nucleosomes labelled at H3-K36C with Cy5, H3-T80C with  
679 AlexaFluor647 and H4-E63C with AlexaFluor647 (C).  
680 (D) Plot showing the mean loss of fluorescent signal for  $\lambda$  nucleosomes (H2A-K119<sup>Cy5</sup>, H2B-T112C<sup>A647</sup>,  
681 H3-K36C<sup>Cy5</sup>, H3-T80C<sup>A647</sup> and H4-E63C<sup>A647</sup>) during incubation in HSS. Over 100 molecules were analyzed  
682 for each histone template. Individual fluorescence decay traces were normalized to background ('0')  
683 and maximum value of fluorescence ('1'). A mean fluorescence value and standard deviation were  
684 calculated and plotted for each time point. The mean value traces were then fitted to a single  
685 exponential function.  
686 (E) Summary of the fluorescence decay rate constants ( $k$ ) and half-lives ( $t_{0.5}$ ) extracted from the single  
687 exponential fit to the data presented in panel C. See Table S2 for detailed fitting parameters.  
688

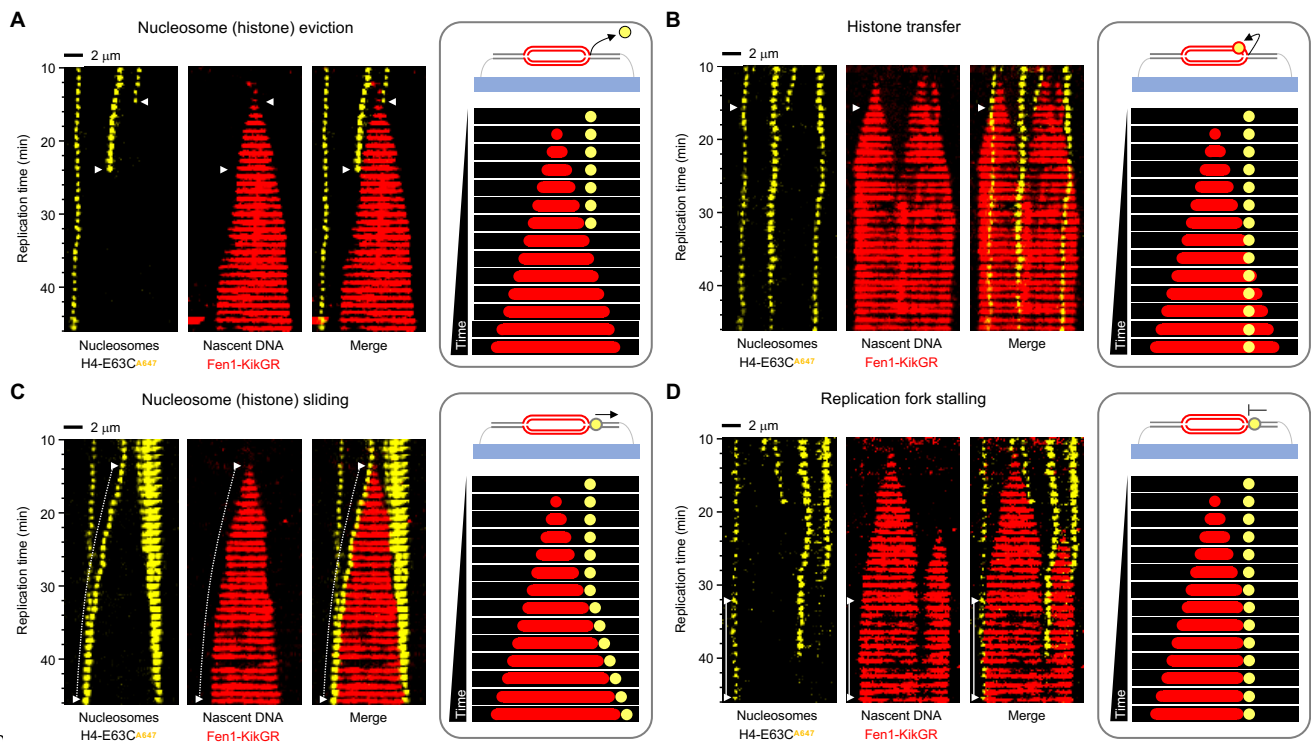

689

690 **Figure 4. Heterogeneous dynamics of parental histones upon replication fork arrival.**

691 For each specified outcome, data are presented as kymograms of nucleosome-associated  
 692 fluorescence (H4-E63C<sup>A647</sup>; yellow; left panels), Fen1-KikGR signal indicating nascent DNA (red; central  
 693 panels) and both signals together (merge; right panels). Time and size scales are presented. The white  
 694 triangles mark the point of initial encounter between the replication fork and nucleosome. Dotted  
 695 lines indicate sliding events, whereas solid lines correspond to replication fork stalling. For clarity, a  
 696 schematic representation of each outcome is shown in grey borders.

697 (A) Nucleosome (histone) eviction is manifested by the loss of histone fluorescence at the point of  
 698 collision with the replication fork. It represents the disassembly of nucleosomes ahead of the  
 699 replication fork.

700 (B) Histone transfer is observed when the histone-associated fluorescence is retained and  
 701 incorporated into the track of replicated DNA. This event illustrates successful localized parental  
 702 histone recycling, whereby a histone released from parental DNA ahead of the replication fork is kept  
 703 in the vicinity of the replisome, followed by its deposition onto daughter DNA.

704 (C) Nucleosome (histone) sliding is observed when the histone-associated fluorescence moves  
 705 together with the tip of the replication bubble (marked as a dotted white line). This behavior is  
 706 consistent with two molecular phenomena; either the whole nucleosome is pushed ahead of the  
 707 replication fork or a parental histone released from the DNA associates with the replisome and travels  
 708 with it along the DNA.

709 (D) Replication fork stalling occurs when nucleosome constitutes a roadblock preventing the  
710 replication fork from further movement. It is manifested in the kymogram as an arrested tip of the  
711 replication bubble next to a static histone signal (indicated as a solid line).  
712

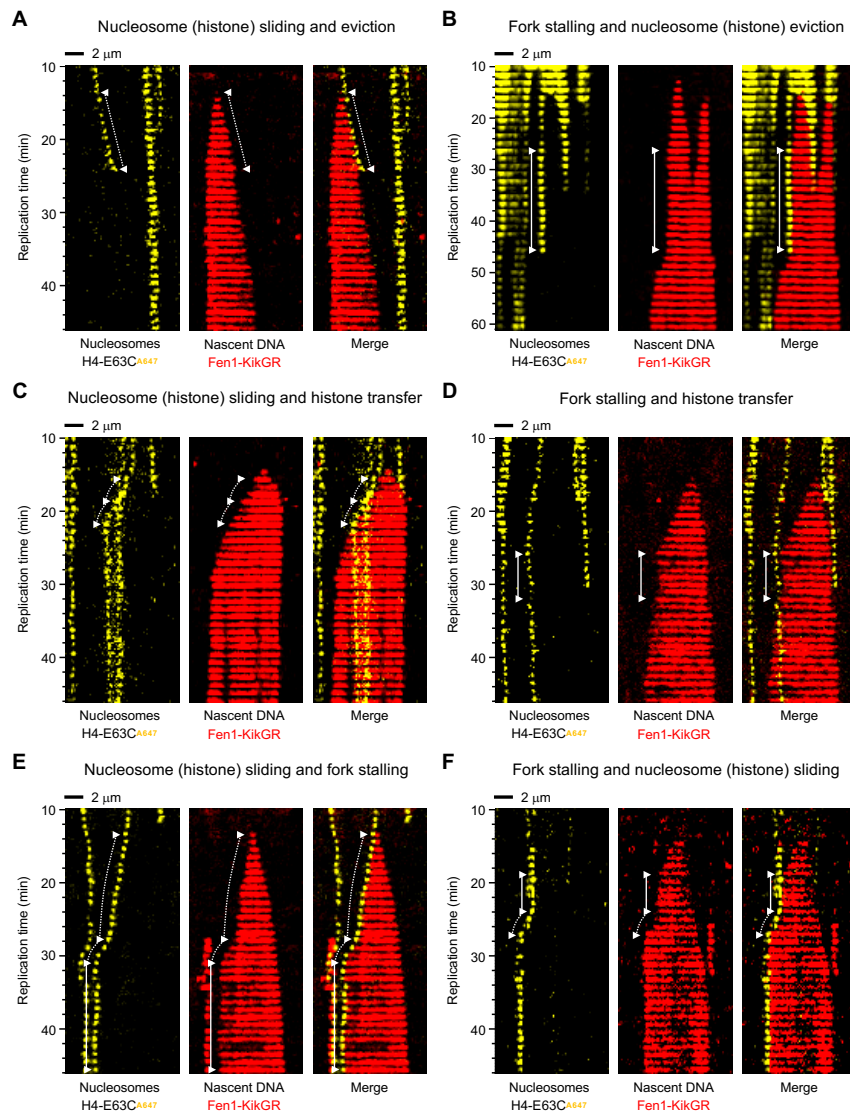

713

714 **Figure 5. Secondary outcomes of the replication fork collision with nucleosomes during DNA**  
715 **replication in *Xenopus* egg extracts.**

716 For each specified outcome, data are presented as kymographs of nucleosome-associated  
717 fluorescence (yellow; left panels), Fen1-KikGR signal indicating nascent DNA (red; central panels) and  
718 both signals together (merge; right panels). Time and size scales are presented. The white triangles  
719 mark the point of initial encounter between the replication fork and nucleosome. Dotted lines indicate  
720 sliding events, whereas solid lines correspond to replication fork stalling.

721 (A, C and E) Nucleosome (histone) sliding can terminate in eviction (A), histone transfer (C) and  
722 replication fork stalling (E).

723 (B, D and F) Replication fork stalling can lead to nucleosome (histone) eviction (B), histone transfer (D)  
724 and nucleosome (histone) sliding (F).

725

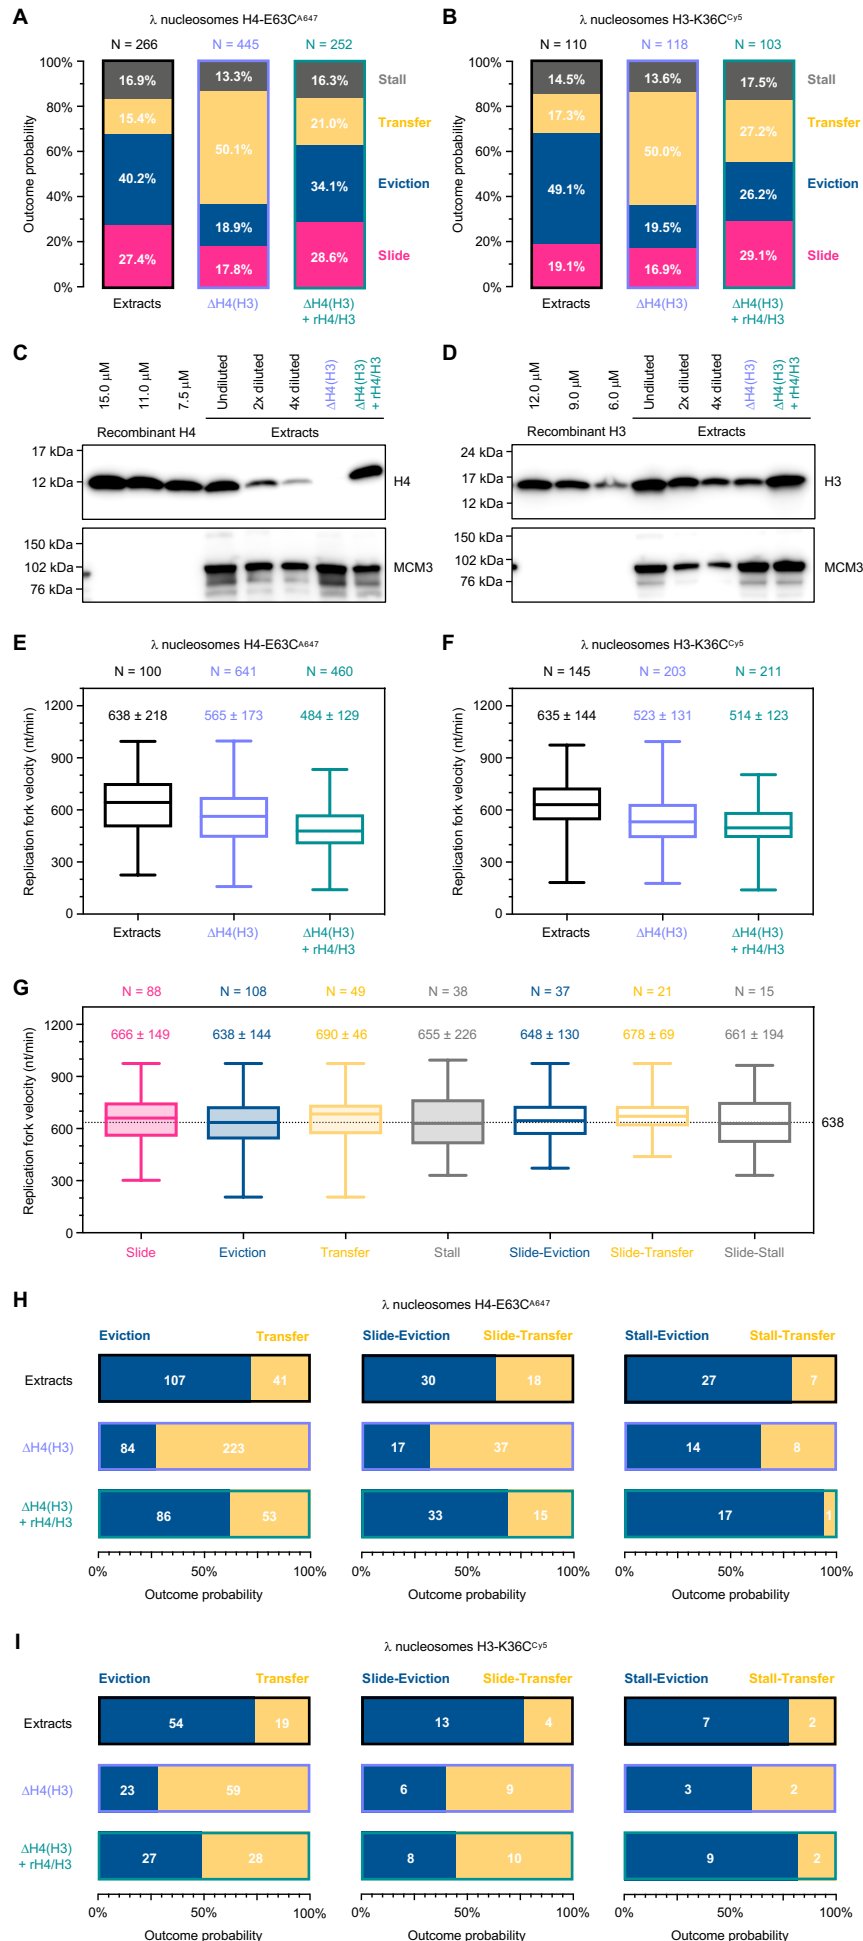

727 **Figure 6. Effect of free histones on parental histone dynamics at the replication fork.**

728 (A and B) Quantification of the four basic outcomes of replication fork collision with nucleosomes  
729 labelled at H4-E63C<sup>A647</sup> (A) and H3-K36C<sup>Cy5</sup> (B) in regular extracts (black borders; left panels; a mix of  
730 HSS and NPE at 1:1 volume ratio), extracts depleted of histone H4 and H3 ( $\Delta$ H4/H3; blue borders;  
731 central panels) and depleted extracts supplemented with recombinant histones H3 and H4 ( $\Delta$ H4/H3  
732 + rH4/H3; green borders; right panels). Nucleosome/histone eviction is shown in blue, histone transfer  
733 in yellow, nucleosome/histone sliding in pink and replication fork stalling in grey. N indicates the total  
734 number of analyzed collisions and contributions from different outcomes are specified. Data from at  
735 least two biological repeats were pooled in the analysis for each tested condition.

736 (C and D) Western blots used to estimate the concentration of histone H4 (C) and H3 (D) in regular  
737 extracts, extracts depleted of histone H4 and H3 ( $\Delta$ H4/H3) and depleted extracts supplemented with  
738 recombinant histones H3 and H4 ( $\Delta$ H4/H3 + rH4/H3).

739 (E and F) Box-and-whisker Tukey plot of replication fork velocities measured in regular extracts (black),  
740 extracts depleted of histone H4 and H3 ( $\Delta$ H4/H3; blue) and depleted extracts supplemented with  
741 recombinant histones H3 and H4 ( $\Delta$ H4/H3 + rH4/H3; green) for  $\lambda$  nucleosomes containing H4-E63C<sup>A647</sup>  
742 (E) and H3-K36C<sup>Cy5</sup> (F). Values above the box plots indicate the mean replication fork velocity extracted  
743 from the Gaussian fit, plus and minus standard deviation. The number of values analyzed per data set  
744 (N) is also shown.

745 (G) Box-and-whisker Tukey plot of replication fork velocities measured in regular extracts and  
746 categorized by the collision outcome. Data for  $\lambda$  nucleosomes containing H4-E63C<sup>A647</sup> and H3-K36C<sup>Cy5</sup>  
747 were pooled to generate this plot. Values above the box plots indicate the mean replication fork  
748 velocity extracted from the Gaussian fit, plus and minus standard deviation. The number of values  
749 analyzed per data set (N) is also shown. The horizontal dotted line marks the mean replication fork  
750 velocity in regular extracts, 638 nt/min.

751 (H and I) Quantification of nucleosome/histone eviction (blue) versus histone transfer (yellow) for  
752 nucleosomes labelled at H4-E63C<sup>A647</sup> (H) and H3-K36C<sup>Cy5</sup> (I). Analysis for primary (eviction versus  
753 transfer) and secondary (slide/stall-eviction versus slide/stall-transfer) outcomes is presented.

754

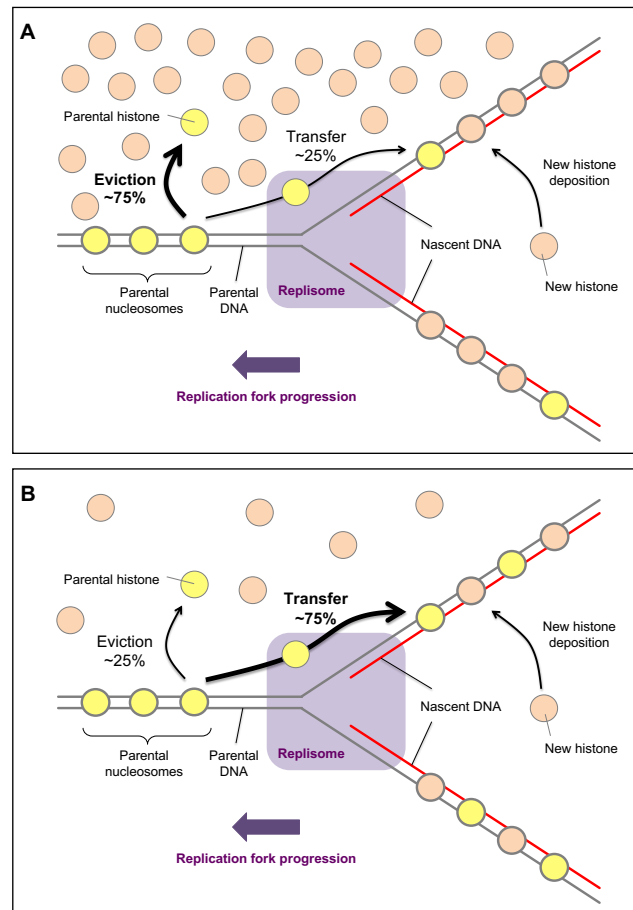

755

756 **Figure 7. Model of parental histone transfer at high and low concentrations of newly synthesized**  
757 **histones.**

758 (A) At high concentrations of free histones, upon the encounter with the replication machinery, the  
759 majority of parental histones are evicted from the DNA and released into the histone pool.

760 (B) When the concentration of newly synthesized histones is low, the majority of parental histones is

761 recycled at the replication fork. Upon nucleosome disassembly ahead of the replication fork, parental

762 histones are released from the DNA but are kept in the vicinity of the replisome, most likely through

763 concerted action of histone chaperones and replisome components. Parental histones are rapidly

764 ushered behind the replication fork where they are deposited onto daughter strands.

765

766 **VIDEO TITLES AND LEGENDS**

767 **Video 1. Related to Figure 2. Singly-tethered low-density  $\lambda$  nucleosomes containing H3-K36C<sup>Cy5</sup>**  
768 **(yellow) imaged in buffer under 'no-flow' conditions followed by 50  $\mu$ l/min flow.** Without buffer  
769 flow low-density nucleosomes on a single  $\lambda$  DNA molecule appear as a diffraction-limited spot of  
770 fluorescence. The molecule unfolds and stretches under flow, unveiling nucleosomes distributed  
771 along  $\lambda$  as 'beads-on-a-string'.

772

773 **Video 2. Related to Figure 2. Doubly-tethered high-density  $\lambda$  nucleosomes containing H3-K36C<sup>Cy5</sup>**  
774 **(yellow) imaged in buffer under 'no-flow' conditions followed by 50  $\mu$ l/min flow.** Doubly-tethered  
775  $\lambda$  molecule saturated with nucleosomes does not stretch under flow, and thus appears as a  
776 diffraction-limited spot of fluorescence throughout the movie.

777

778 **Video 3. Related to Figure 3B. Stretched  $\lambda$  nucleosomes containing H2A-K119C<sup>Cy5</sup> (yellow) during**  
779 **incubation in HSS (3-14min).**

780

781 **Video 4. Related to Figure 3B. Stretched  $\lambda$  nucleosomes containing H2B-T112C<sup>A647</sup> (yellow) during**  
782 **incubation in HSS (3-14min).**

783

784 **Video 5. Related to Figure 3C. Stretched  $\lambda$  nucleosomes containing H3-K36C<sup>Cy5</sup> (yellow) during**  
785 **incubation in HSS (3-14min).**

786

787 **Video 6. Related to Figure 3C. Stretched  $\lambda$  nucleosomes containing H3-T80C<sup>A647</sup> (yellow) during**  
788 **incubation in HSS (3-14min).**

789

790 **Video 7. Related to Figure 3C. Stretched  $\lambda$  nucleosomes containing H4-E63C<sup>A647</sup> (yellow) during**  
791 **incubation in HSS (3-14min).**

792

793 **Video 8. Related to Figure 4A. Example of nucleosome-fork collision resulting in nucleosome**  
794 **(histone) eviction.** Nucleosome/histone eviction is manifested by the loss of histone fluorescence (H4-  
795 E63C<sup>A647</sup>; yellow) at the point of collision with the progressing replication fork (Fen1-KikGR; red).

796

797 **Video 9. Related to Figure 4B. Example of nucleosome-fork collision resulting in histone transfer**  
798 **behind the replication fork.** Histone transfer is observed when the histone-associated fluorescence  
799 H4-E63C<sup>A647</sup>; yellow) is retained and incorporated into the track of replicated DNA (Fen1-KikGR; red).



800

801 **Video 10. Related to Figure 4C. Example of nucleosome-fork collision resulting in**  
802 **nucleosome/histone sliding.** Nucleosome (histone) sliding is observed when the histone-associated  
803 fluorescence (H4-E63C<sup>A647</sup>; yellow) moves together with the tip of the replication bubble (Fen1-KikGR;  
804 red).

805

806 **Video 11. Related to Figure 4D. Example of nucleosome-fork collision resulting in replication fork**  
807 **stalling.** Replication fork stalling occurs when nucleosome constitutes a roadblock preventing the  
808 replication fork from further movement and is manifested by an arrested tip of the replication bubble  
809 (Fen1-KikGR; red) next to a static histone signal (H4-E63C<sup>A647</sup>; yellow).

810

811 **Video 12. Related to Figure 5A. Example of nucleosome-fork collision resulting in**  
812 **nucleosome/histone sliding followed by eviction.** H4-E63C<sup>A647</sup> histones are shown in yellow and the  
813 Fen1-KikGR-decorated replication bubble is shown in red.

814

815 **Video 13. Related to Figure 5B. Example of nucleosome-fork collision resulting in replication fork**  
816 **stalling followed by nucleosome/histone eviction.** H4-E63C<sup>A647</sup> histones are shown in yellow and the  
817 Fen1-KikGR-decorated replication bubble is shown in red.

818

819 **Video 14. Related to Figure 5C. Example of nucleosome-fork collision resulting in**  
820 **nucleosome/histone sliding followed by histone transfer.** H4-E63C<sup>A647</sup> histones are shown in yellow  
821 and the Fen1-KikGR-decorated replication bubble is shown in red.

822

823 **Video 15. Related to Figure 5D. Example of nucleosome-fork collision resulting in replication fork**  
824 **stalling followed by histone transfer.** H4-E63C<sup>A647</sup> histones are shown in yellow and the Fen1-KikGR-  
825 decorated replication bubble is shown in red.

826

827 **Video 16. Related to Figure 5E. Example of nucleosome-fork collision resulting in**  
828 **nucleosome/histone sliding followed by replication fork stalling.** H4-E63C<sup>A647</sup> histones are shown in  
829 yellow and the Fen1-KikGR-decorated replication bubble is shown in red.

830

831 **Video 17. Related to Figure 5F. Example of nucleosome-fork collision resulting in replication fork**  
832 **stalling followed by nucleosome/histone sliding.** H4-E63C<sup>A647</sup> histones are shown in yellow and the  
833 Fen1-KikGR-decorated replication bubble is shown in red.

## 834 **METHODS**

### 835 **Preparation of biotinylated $\lambda$ DNA**

836 Singly-biotinylated  $\lambda$  DNA was prepared as described in (Yardimci et al., 2012). Doubly-biotinylated  
837  $\lambda$  DNA was prepared by mixing 80  $\mu$ M biotin-14-dCTP (Invitrogen; 19524-016), 80  $\mu$ M biotin-14-dATP  
838 (Invitrogen; 19518-018), 100  $\mu$ M dTTP (Thermo Fisher Scientific; R0171), 100  $\mu$ M dGTP (Thermo Fisher  
839 Scientific; R0161), 130 ng/ $\mu$ l  $\lambda$  DNA (NEB; N3011) and 0.05 U/ $\mu$ l of Klenow fragment (NEB; M0212S)  
840 in provided Klenow buffer. Mixture was incubated at 37°C for 30 minutes, followed by 15 minutes at  
841 70°C.  $\lambda$  DNA was purified using QIAquick PCR Purification Kit (QIAGEN; 28104) and stored at 4°C. This  
842 method introduces multiple biotins at each end of  $\lambda$  DNA (7 biotins at the left end and 4 biotins at the  
843 right end, assuming 100% incorporation of biotinylated dNTPs).

### 844 **Histone labelling under denaturing conditions**

845 Purified, recombinant *Xenopus* histones were purchased from The Histone Source, Protein Expression  
846 and Purification Facility, Colorado State University, and their correct molecular mass was verified by  
847 mass spectrometry (Proteomics Science Technology Platform, Francis Crick Institute). Histones H2A-  
848 K119C, H2B-T112C, H3-C110A-T80C and H4-E63C were labelled with either Cy<sup>®</sup>5 maleimide (GE  
849 Healthcare; PA25031) or Alexa Fluor<sup>™</sup> 647 C<sub>2</sub> maleimide (Thermo Fisher Scientific; A20347) using thiol-  
850 modification of engineered cysteines. Prior to labelling, histones were reduced and denatured in 20  
851 mM Tris-HCl pH 7.5 (Sigma; T1503; and Fisher Scientific; 10316380), 10 mM Tris(2-  
852 carboxyethyl)phosphine (TCEP; Sigma; 646547) and 7M guanidine hydrochloride (Sigma; 50940) for  
853 30 minutes at room temperature. Each denaturing reaction contained a chosen histone at a  
854 concentration of 150  $\mu$ M in a total volume of 250  $\mu$ l (equivalent to approximately 0.5 mg of histone).  
855 One vial of Cy<sup>®</sup>5 maleimide or 0.5 mg of Alexa Fluor<sup>™</sup> 647 C<sub>2</sub> maleimide was dissolved in 50  $\mu$ l of  
856 anhydrous dimethyl sulfoxide (DMSO; Invitrogen; D12345) and then mixed dropwise with 250  $\mu$ l of  
857 the denatured histone solution. Labelling reactions were carried out for 2.5–3 hours at room  
858 temperature and protected from light.  $\beta$ -mercaptoethanol (Sigma; 101458612) was added to a  
859 labelling reaction at a 100-fold molar excess of the dye to consume any unreacted species. The  
860 quenched reaction was used immediately to refold histone octamer.

### 861 **Histone octamer refolding and purification**

862 Histone octamer refolding protocol was adapted from (Dyer et al., 2004). Histones were individually  
863 reduced and denatured in 20 mM Tris-HCl pH 7.5, 10 mM  $\beta$ -mercaptoethanol and 7M guanidine  
864 hydrochloride for 3 hours at room temperature. Each denaturing reaction contained a chosen histone  
865 at a concentration of 150  $\mu$ M in a total volume of 250  $\mu$ l (equivalent to approximately 0.5 mg of  
866 histone). Denatured histones H2A, H2B, H3 and H4, were mixed at equimolar ratios and adjusted to a

867 total protein concentration of 1 mg/ml with unfolding buffer (20 mM Tris-HCl pH 7.5, 10 mM  $\beta$ -  
868 mercaptoethanol and 7M guanidine hydrochloride). For labelled octamer refolding, a quenched  
869 labelling reaction was used instead of a wild-type denatured histone. Denatured histone mix was  
870 loaded into a MaxiGeBaFlex dialysis tube (Generon; D045; 8 kDa molecular weight cutoff; 2–3 ml  
871 capacity) and dialyzed at 4°C against 2 l of 10 mM Tris-HCl pH 7.5, 1 mM ethylenediaminetetraacetic  
872 acid disodium salt dihydrate (EDTA; Sigma; E5134), 5 mM  $\beta$ -mercaptoethanol and 2 M NaCl (Sigma;  
873 S9888). Refolding buffer was changed at least three times for unlabelled octamer and four times for  
874 fluorescently labelled octamers (1<sup>st</sup> – overnight, 2<sup>nd</sup> – 8 hours, 3<sup>rd</sup> – overnight, 4<sup>th</sup> – 8hrs).

875 Refolded histone mixture was recovered from the dialysis device and concentrated to  
876 approximately 0.3 ml using VivaSpin 500 centrifugal concentrator (Sartorius; VS0121; 30 kDa  
877 molecular weight cutoff; PES) at 2°C, 15,000 x g. Concentrated sample was resolved on a Superdex  
878 200 Increase GL10/300 column (GE Healthcare; 28-9909-44), over 1.1 column volume of refolding  
879 buffer (10 mM Tris-HCl pH 7.5, 1 mM EDTA, 5 mM  $\beta$ -mercaptoethanol and 2 M NaCl) at 0.3 ml/min  
880 flow rate, 4°C. Fractions containing stoichiometric octamer, as verified by SDS-PAGE, were pooled and  
881 concentrated using VivaSpin 500 centrifugal concentrator (30 kDa molecular weight cutoff; PES).  
882 Octamer concentration and labelling efficiency were estimated spectrophotometrically from the  
883 absorbance measurement at 276 and 650 nm. Octamer was flash-frozen in liquid nitrogen and stored  
884 at -80°C.

### 885 **Histone octamer labelling under native conditions**

886 Histone octamer containing H3-K36C<sup>Cy5</sup> was prepared by thiol-modification under native conditions.  
887 Octamer containing unlabelled H3-K36C was refolded and purified as described above, but the  
888 unfolding and refolding buffers contained TCEP, instead of  $\beta$ -mercaptoethanol, as a reducing agent.  
889 0.5 mg of octamer was adjusted to a concentration of 1 mg/ml with refolding buffer. One vial of Cy<sup>®</sup>5  
890 maleimide was dissolved in 50  $\mu$ l of anhydrous DMSO and then mixed dropwise with the octamer  
891 solution. Labelling reactions were carried out overnight at 2°C, protected from light.  $\beta$ -  
892 mercaptoethanol (Sigma; 101458612) was added to a labelling reaction at a 100-fold molar excess of  
893 the dye to quench any unreacted species. Excess dye was removed using Micro Bio-Spin P-30 Columns  
894 (Bio-Rad; 7326202), pre-equilibrated with refolding buffer. Octamer concentration and labelling  
895 efficiency were estimated spectrophotometrically from the absorbance measurement at 276 and 650  
896 nm. Octamer was flash-frozen in liquid nitrogen and stored at -80°C.

### 897 **Nucleosome reconstitution**

898 Nucleosome reconstitution was performed by NaCl gradient dialysis method. For each reconstitution  
899 reaction, 1  $\mu$ g of DNA was mixed with a desired molar excess of histone octamer (from 0 to 300 for  $\lambda$

900 DNA) in 10 mM Tris-HCl pH 7.5, 1 mM EDTA and 2 M NaCl, to a final volume of 100  $\mu$ l, and incubated  
901 on ice for 30 min. Samples were then transferred into a Slide-A-Lyzer<sup>®</sup> MINI dialysis units (Thermo  
902 Scientific; 96570) and dialyzed overnight against 1 l of 10 mM Tris-HCl pH 7.5, 1 mM EDTA and 1 M  
903 NaCl. Second dialysis was performed for 8 hours against 1 l of 10 mM Tris-HCl pH 7.5, 1 mM EDTA and  
904 0.75 M NaCl, before the final overnight dialysis against 1 l of 10 mM Tris-HCl pH 7.5, 1 mM EDTA and  
905 20 mM NaCl. Reconstituted nucleosomes were recovered from the dialysis devices and stored at 4°C.  
906 Samples containing fluorescently labelled histones were protected from light at each step.

#### 907 **Electrophoretic mobility shift assay (EMSA)**

908 100 ng of naked  $\lambda$  DNA or  $\lambda$  nucleosomes in 10 mM Tris-HCl pH 7.5, 1 mM EDTA, 20 mM NaCl, 10 %  
909 glycerol (Fisher Scientific; BP229-1) were resolved on a 0.5 % agarose (Denville Scientific Inc.; CA3510-  
910 8) gel in 20 mM Tris and 20 mM boric acid (Fisher Chemical; B/3800/53) for 120 minutes at 100 V.  
911 After electrophoresis, DNA was stained with SYBR<sup>™</sup> Gold nucleic acid gel stain (Thermo Fisher  
912 Scientific; S11494), following the manufacturer's protocol. Gels were imaged using fluorescent image  
913 analyzer FLA-5000 (Fujifilm). Samples containing fluorescently labelled histones were protected from  
914 light at each step.

#### 915 **Native micrococcal nuclease (MNase) protection assay**

916 100 ng of naked  $\lambda$  or  $\lambda$  nucleosomes in 10 mM Tris-HCl pH 7.5, 1 mM EDTA and 20 mM NaCl were  
917 supplemented with micrococcal nuclease buffer (NEB; M0247S), following the manufacturer's  
918 instructions, and then digested with 10 GU of micrococcal nuclease (MNase; NEB; M0247S) for 10  
919 minutes at room temperature. Digest was quenched by adding EDTA to a concentration of 25 mM and  
920 10 % glycerol was used as a loading agent. Digested samples were resolved on a 1.5 % agarose gel in  
921 20 mM Tris and 20 mM boric acid for 120 minutes at 100 V. After electrophoresis, DNA was stained  
922 with SYBR<sup>™</sup> Gold nucleic acid gel stain and imaged using fluorescent image analyzer FLA-5000.  
923 Samples containing fluorescently labelled histones were protected from light at each step.

#### 924 **Denaturing micrococcal nuclease (MNase) protection assay**

925 In the denaturing MNase protection assay, samples were prepared, digested and quenched as  
926 described for native assay. Upon quenching with EDTA, each sample was supplemented with sodium  
927 dodecyl sulfate (SDS; Sigma; 436143) to a concentration of 0.8 % and 0.8 U of proteinase K (NEB;  
928 P8107S). Protein digest was conducted at 37°C for 1 hour. Samples were supplemented with glycerol  
929 to 10 % and resolved on a 1.5 % agarose gel in 100 mM Tris, 100 mM boric acid and 2 mM EDTA (TBE).  
930 DNA was stained with SYBR<sup>™</sup> Gold nucleic acid gel stain and imaged using fluorescent image analyzer  
931 FLA-5000.

#### 932 ***Xenopus laevis* egg extracts preparation**

933 High speed supernatant (HSS) and nucleoplasmic extract (NPE) were prepared as described previously  
934 (Lebofsky et al., 2009) and stored at -80°C. Prior to both bulk and single-molecule replication assays,  
935 each 33 µl aliquot of HSS was supplemented with 250 ng of nocodazole (Sigma; M1404) and 1 µl of an  
936 ATP regeneration system, containing 650 mM phosphocreatine (Sigma; P7936), 65 mM ATP (pH 7.0;  
937 Sigma; A2754) and 0.161 mg/ml creatine phosphokinase (Sigma; C3755). Similarly, each 16 µl aliquot  
938 of NPE was supplemented with 0.5 µl of ATP mix. Activated extracts were centrifuged for 5 minutes  
939 at 16,000 x g, room temperature, and used in replication assays.

#### 940 **Histone depletion from *Xenopus* egg extracts**

941 50 µl (bed volume) of protein A sepharose (PAS; GE Healthcare; GE17-1279-01), pre-washed with ice-  
942 cold phosphate-buffered saline (PBS; Gibco; 70011044; six times with 300 µl), was mixed with 300 µl  
943 of a 1.6 mg/ml anti-H4-K12Ac antibody solution in PBS, and then incubated overnight at 4°C, 20 rpm.  
944 PAS loaded with an antibody was washed four times with 300 µl of cold PBS and three times with 300  
945 µl of cold ELB by centrifugation. 200 µl of HSS-NPE mix (extracts were not supplemented with ATP mix  
946 but nocodazole was added into HSS to prevent microtubule polymerization) at 1:1 volume ratio was  
947 next mixed with 50 µl (bed volume) of antibody-loaded PAS and incubated for 1 hour at 4°C, 20 rpm.  
948 Extracts were separated from PAS by spinning through a nitex column, as described in (Lebofsky et al.,  
949 2009). Cleared extracts were mixed with 34 µl (bed volume) of PAS, pre-washed with cold PBS (six  
950 times with 300 µl) and ELB (three times with 300 µl), and incubated for 45 minutes at 4°C, 20 rpm.  
951 This step ensures that any leftover antibody is captured and removed from extracts. Finally, depleted  
952 extracts were clarified on a nitex spin column and either used immediately in replication assays or  
953 snap-frozen in liquid nitrogen and stored at -80°C.

#### 954 **Bulk replication assay**

955 Naked pBR11 (pBlueScript II; Agilent Technologies; 212205) plasmid and pBR11 containing fluorescent  
956 nucleosomes (at a saturation level equivalent with  $\lambda$  nucleosomes in single molecule replication  
957 assays) labelled at H3-K36C<sup>Cy5</sup> or H4-E63CA<sup>647</sup> were adjusted to a DNA concentration of 18 ng/µl with  
958 egg lysis buffer (ELB; 2.5 mM MgCl<sub>2</sub>, 50 mM KCl, 10 mM HEPES-KOH, pH 7.7; Sigma M8266; Sigma  
959 P9333; Sigma H3375), supplemented with ATP mix (1 µl per 16 µl of DNA in ELB), and then mixed at  
960 1:1 volume ratio with activated HSS. Equivalent reactions were set up with HSS supplemented and  
961 preincubated (5 minutes at room temperature) with 4 µM geminin, as replication-negative controls.  
962 All samples were incubated for 15 minutes at room temperature to promote origin licensing. 16 µl of  
963 activated NPE was supplemented with 0.2 µl of 10 mCi/ml [ $\alpha$ -<sup>32</sup>P]dATP (3 kCi/mmol; Perkin Elmer;  
964 BLU512H250UC). [ $\alpha$ -<sup>32</sup>P]dATP gets incorporated into nascent DNA strands during replication, and thus  
965 allows to track the progress of replication in time. At 8, 15 and 30 minutes after NPE was introduced,

966 a 2.5  $\mu$ l aliquot of a replication reaction was stopped by mixing in 5.0  $\mu$ l of solution containing 25 mM  
967 Tris-HCl pH 8.0, 2% SDS, 75 mM EDTA and 8 U/ml proteinase K, and incubated at 37°C for 1 hour.  
968 Replication reactions were separated on a 0.8 % agarose gel in TBE at 90 V, room temperature. Gel  
969 was dried and visualized using fluorescent image analyzer FLA-5000 in a phosphorescence mode.

#### 970 **Expression and purification of Fen1-KikGR**

971 Fen1-KikGR was expressed and purified from *E. coli* with some modifications to the protocol described  
972 in (Loveland et al., 2012). BL21-CodonPlus (DE3)-RIPL competent cells (Agilent Technologies; 230280)  
973 were transformed with the pET28-Fen1-KikGR expression plasmid and selected on LB-agar plates  
974 supplemented with 50  $\mu$ g/ml of kanamycin (Sigma; BP861). A single colony was used to inoculate 50  
975 ml of selective LB medium. After overnight incubation at 37°C on a shaker (220 rpm), 5 ml of this starter  
976 culture was used to inoculate 500 ml of fresh selective LB medium. Cultures were grown at 37°C, with  
977 shaking, until the optical density at 600 nm reached 0.6 and were then cooled down to 20°C in a water  
978 bath. Isopropyl- $\beta$ -D-thiogalactoside (IPTG; Fisher Scientific; 10725471) was added to a final  
979 concentration of 0.5 mM and cultures were grown overnight at 20°C and protected from light. Cells  
980 were harvested by centrifugation for 15 minutes at 5'000 x g, 4°C.

981 Cell pellets from 2 l of culture were resuspended in 20 mM Tris-HCl pH 8.0, 1 M NaCl, 1 mM  
982 1,4-dithiothreitol (DTT; Sigma; 10197777001), 50 mM imidazole (Sigma; I5513) to a final volume of 40  
983 ml and lysed by sonication (60 pulses of 3 seconds at 70 W with 7 second pauses between pulses). The  
984 crude extract was cleared from insoluble cell debris by centrifugation for 45 minutes at 45,000 x g at  
985 4°C. The supernatant was filtered through a 0.22  $\mu$ m PES membrane (Merck Millipore; SLGP033RS),  
986 supplemented with EDTA-free protein inhibitor cocktail (Roche; 5056489001) and loaded onto a 5 ml  
987 HisTrap HP column (GE Healthcare; 17-5248), pre-equilibrated with 20 mM Tris-HCl pH 8.0, 1 M NaCl,  
988 1 mM DTT, 50 mM imidazole. Proteins were eluted with a linear gradient of imidazole from 50 to 500  
989 mM over 10 column volumes at 4°C. Eluted fractions were analyzed by SDS-PAGE and those containing  
990 Fen1-KikGR were pooled and dialyzed overnight at 4°C against 10 mM HEPES-KOH pH 7.7, 2.5 mM  
991 MgCl<sub>2</sub>, 300 mM NaCl, 1 mM EDTA, 1 mM DTT, 10 % glycerol. Dialyzed protein solution was  
992 concentrated using VivaSpin 20 centrifugal concentrators, 10 kDa molecular weight cutoff (Sartorius;  
993 VS2002). The final concentration of purified Fen1-KikGR was estimated spectrophotometrically from  
994 the absorbance measurement at 280 and 505 nm. 3  $\mu$ l aliquots of Fen1-KikGR were flash-frozen in  
995 liquid nitrogen and stored at -80°C.

#### 996 **Single-molecule replication assay**

997 Microfluidic flow cells with PEGylated and streptavidin-functionalized glass surface were prepared as  
998 described previously (Yardimci et al., 2012). Flow cells were mounted on a Nikon Eclipse Ti motorized

999 inverted microscope, equipped with a 100x high numerical aperture TIRF objective (SR Apo TIRF 100x  
1000 1.49 Oil; Nikon), the Perfect Focus System and supported by LU-N4 laser unit (Nikon), providing four  
1001 lasers: 405, 488, 561 and 640 nm (15 mW output power at the fiber end). Images were recorded using  
1002 a 512 x 512 pixel, back illuminated, electron-multiplying charge-coupled-device camera (iXon DU-987,  
1003 Andor Technology; 3 MHz pixel readout rate, 14 bit digitization and 300x electron multiplier gain)  
1004 controlled by NIS-Elements software (Nikon). The pixel size was 160 x 160 nm. All buffers and solutions  
1005 were thoroughly degassed immediately before use. Flow was controlled by an automated syringe  
1006 pump (Pump 11 Elite; Harvard Apparatus; 70-4505). All experiments were conducted at room  
1007 temperature.

1008         Prior to DNA immobilization, microfluidic channels were washed with blocking buffer  
1009 containing 20 mM Tris pH 7.5, 50 mM NaCl, 2 mM EDTA and 0.2 mg/ml BSA (albumin from bovine  
1010 serum; Sigma; A7906). For immobilization of singly-biotinylated  $\lambda$  nucleosomes, 125  $\mu$ l of DNA or  
1011 nucleosome solution at a concentration of 0.1 ng/ $\mu$ l in blocking buffer were passed through the  
1012 channel at a flow rate of 25  $\mu$ l/min. DNA was incubated in the channel for 10 minutes and any unbound  
1013 molecules were removed by washing with 250  $\mu$ l of blocking buffer at 50  $\mu$ l/min flow rate. Doubly-  
1014 biotinylated naked  $\lambda$  or  $\lambda$  nucleosomes were immobilized by passing through 500  $\mu$ l of DNA or  
1015 nucleosome solution at a concentration of 0.1 ng/ $\mu$ l in blocking buffer at a flow rate of 100  $\mu$ l/min.  
1016 This procedure immobilizes  $\lambda$  DNA and  $\lambda$  nucleosomes to approximately 70 % of their respective,  
1017 maximally stretched contour lengths. Cy5 or Alexa Fluor 647 labelled histones within immobilized  
1018 nucleosomes were imaged using 640-nm laser at 10 % power, 100 ms exposure time and  
1019 ZT405/488/561/647rpc dichroic (Chroma). Tethered DNA molecules were stained with 5 nM SYTOX™  
1020 Orange (Thermo Fisher Scientific; S11368) in blocking buffer and imaged using 560-nm laser at 5 %  
1021 power, 100 ms exposure time and ZT405/488/561/647rpc dichroic. To remove SYTOX Orange, flow  
1022 cell was washed extensively with blocking buffer, 0.5 – 1.0 ml at a flow rate of 50  $\mu$ l/min. Immediately  
1023 before licensing, ELB supplemented with casein (Sigma; C4765) and BSA to a final concentration of 1  
1024 mg/ml was introduced into the channel at 25  $\mu$ l/min for 3 minutes.

1025         For licensing of the immobilized DNA, an aliquot of activated and span down HSS (see *Xenopus*  
1026 *laevis* egg extracts preparation) was transferred to a fresh tube, supplemented with a short linear  
1027 ‘carrier’ DNA (pre-annealed oligos 5’-GCA GCA ACA GAA GCC ATG GAT GCC CTG AC-3’ and 5’-GTC AGG  
1028 GCA TCC ATG GCT TCT GTT GCT GC-3’) to a concentration of 10 ng/ $\mu$ l and incubated for 5 minutes.  
1029 HSS was introduced into the channel at a flow rate of 10  $\mu$ l/min over 2.5 minutes and incubated for  
1030 further 12.5 minutes. During licensing in HSS, Cy5 or Alexa Fluor 647 labelled histones were imaged  
1031 using 640 nm laser at 5 % power, 100 ms exposure time and ZT405/488/561/647rpc dichroic

1032 (Chroma). Images were collected for 25 different fields of view (5 x 5 grid; 512 x 512 pixel per field of  
1033 view) at a 11-seconds interval between frames.

1034 While the licensing reaction was taking place, replication extracts were prepared by mixing  
1035 activated HSS, NPE and ELB at 1:1:1 volume ratio. The replication mix was further supplemented with  
1036 the pBRII plasmid to a final concentration of 5 ng/ $\mu$ l, Fen1-KikGR to 2.5  $\mu$ M and oxygen scavenging  
1037 system (i.e. glucose to 40 mM, pyranose oxidase to 2.5 U/ml and catalase to 120 U/ml; Sigma G8270;  
1038 Sigma P4234-250UN; Sigma C30-100MG; (Swoboda et al., 2012)). For unrestricted origin firing  
1039 (replication from multiple origins), 40  $\mu$ l of this mix was drawn into the channel at a 10  $\mu$ l/min flow  
1040 rate. To achieve replication from single origins, the mix was split into two 20  $\mu$ l aliquots. One aliquot  
1041 was immediately drawn into the channel at 10  $\mu$ l/min for 2 minutes to initiate replication of licensed  
1042 and immobilized DNA molecules. The other aliquot was supplemented with p27<sup>Kip</sup>, a Cdk2 inhibitor,  
1043 to a concentration of 0.1  $\mu$ g/ $\mu$ l and introduced into the channel when about one or two origins per  
1044 template fired; typically, between 4 to 8 minutes from the moment the first extract was drawn in.  
1045 During replication, Cy5 or Alexa Fluor 647 labelled histones were imaged using 640-nm laser at 5 %  
1046 power, 100-ms exposure time and ZT405/488/561/647rpc dichroic. Fen1-KikGR-decorated replication  
1047 bubbles were imaged using 488-nm laser at 5 % power, 100-ms exposure time and  
1048 ZT405/488/561/647rpc dichroic. Unless stated otherwise, images were collected for 36 different fields  
1049 of view (6 x 6 grid; 512 x 512 pixel per field of view) at a 1-minute interval between frames.

1050 For replication in extracts depleted of endogenous histones H4 and H3, DNA template  
1051 immobilization and licensing were conducted as described above. 16  $\mu$ l of H4(H3)-depleted HSS-NPE  
1052 mix was supplemented with 0.5  $\mu$ l of ATP mix and centrifuged for 5 minutes at 16,000 x g, room  
1053 temperature. The activated extract mix was next transferred to a fresh tube and supplemented with  
1054 pBRII to a final concentration of 5 ng/ $\mu$ l, Fen1-KikGR to 2.5  $\mu$ M and oxygen scavenging system (i.e.  
1055 glucose to 40 mM, pyranose oxidase to 3 U/ml and catalase to 90 U/ml). In the case of replication  
1056 experiments in extracts depleted of endogenous histones but supplemented with recombinant  
1057 histones, the activated mix was additionally supplemented with histones H3 and H4 to a final  
1058 concentration of 20  $\mu$ M. The volume was adjusted to 20  $\mu$ l with ELB, the mixture was drawn into the  
1059 channel and imaging was conducted as described for undepleted extracts. Depleted extracts showed  
1060 lower overall origin firing efficiency, relative to undepleted extracts, and so did not require p27<sup>Kip</sup>  
1061 supplementation for individual bubble growth tracking during replication.

1062 For replication in the absence of Fen1-KikGR, DNA template immobilization and licensing were  
1063 conducted as described above. Replication extracts were prepared by mixing activated HSS, NPE and  
1064 ELB at 1:1:1 volume ratio. The replication mix was further supplemented with pBRII to a final  
1065 concentration of 5 ng/ $\mu$ l, digoxigenin-11-dUTP (dig-dUTP; Roche; 11093088910) to 1.7 mM and



1066 oxygen scavenging system (i.e. glucose to 40 mM, pyranose oxidase to 3 U/ml and catalase to 90  
1067 U/ml). The mix was split into two 20  $\mu$ l aliquots. One aliquot was immediately drawn into the channel  
1068 at 10  $\mu$ l/min for 2 minutes to initiate replication. The other aliquot was supplemented with p27<sup>Kip</sup> to  
1069 a concentration of 0.1  $\mu$ g/ $\mu$ l and introduced into the channel at 9 minutes from the moment the first  
1070 extract was drawn in. Replication elongation was allowed to proceed for next 31 minutes before a  
1071 buffer containing 20 mM Tris pH 7.5, 10 mM EDTA and 0.5 M NaCl was flown in at a rate of 20  $\mu$ l/min  
1072 over 10 minutes to wash out the extracts. The flow cell was next washed with 250  $\mu$ l of blocking buffer  
1073 at 50  $\mu$ l/min flow rate. 350  $\mu$ l of a 0.2 ng/ $\mu$ l solution of fluorescein labelled anti-digoxigenin Fab  
1074 fragments from sheep (anti-dig Ab<sup>Fluor</sup>; Roche; 11207741910) in blocking buffer, supplemented with 1  
1075 mg/ml of casein and 1 mg/ml of BSA, was introduced into the chamber at a flow rate of 10  $\mu$ l/min.  
1076 The flow cell was next washed with 100  $\mu$ l of blocking buffer at 20  $\mu$ l/min flow rate. Finally,  $\lambda$  DNA  
1077 was stained with a 5 nM SYTOX Orange solution in blocking buffer, drawn into the cell at a rate of 20  
1078  $\mu$ l/min. Cy5-labelled histones were imaged using 640-nm laser at 5 % power, 100-ms exposure time  
1079 and ET700/50m emission filter (Chroma). Nascent DNA, decorated with anti-dig Ab<sup>Fluor</sup>, was imaged  
1080 using 488-nm laser at 2 % power, 100-ms exposure time and ET525/50m emission filter (Chroma).  
1081 Sytox was excited using 561-nm laser at 5 % power, 100-ms exposure time and ET600/50 m emission  
1082 filter (Chroma).

### 1083 **Single-molecule data processing, analysis and quantification**

1084 All data were recorded in a 5 x 5 or 6 x 6 field of view grid format. Data were first denoised using  
1085 'advanced denoising' in NIS-Analysis (Nikon), with a denoising power set to 0 for all channels.  
1086 Background was corrected using a rolling ball algorithm (NIS-Analysis; Nikon), with a ball radius set to  
1087 0.96  $\mu$ m. Grid images were next split to individual fields of view, which were subsequently corrected  
1088 for drift using 'align' in NIS-Analysis. Regions of interest were selected by hand, cropped and, if  
1089 needed, rotated using Fiji. Kymograms were generated using 'montage' in Fiji.

1090 For intensity analysis during licensing in HSS, the intensity plots were generated in Fiji for  
1091 individual molecules between 3 and 14 min of incubation time. Data were normalized to background  
1092 ('0') and maximum intensity value ('1'). Average intensity profiles were generated for each tested  
1093 nucleosomal template, with a mean fluorescence value and standard deviation calculated at each time  
1094 point. The mean value traces were then fitted to a single exponential decay model using Prism  
1095 (GraphPad).

1096 Replication fork velocities were calculated by measuring the distance travelled by an  
1097 individual fork over time, in  $\mu$ m/min. Velocities were next converted to nt/min based on the measured  
1098 average length of  $\lambda$  DNA from SYTOX staining. Mean fork velocities and associated standard deviations  
1099 were calculated from a Gaussian fit to a histogram (GraphPad Prism).

1100 For the analysis of fork-nucleosome collision outcomes, a number of criteria were  
1101 implemented to ensure their reliable assignment and quantification. Only well-separated stretched  $\lambda$   
1102 molecules were included in the analysis. Histones that displayed thermal fluctuations inconsistent  
1103 with the stretched  $\lambda$  DNA molecule were excluded from the analysis; for example, if a broken singly-  
1104 tethered  $\lambda$  DNA is located close to a doubly-tethered  $\lambda$  DNA, its nucleosomes may at a first glance  
1105 appear as part of the doubly-tethered molecule but are usually distinguishable through local  
1106 fluctuations over time. Histone eviction was defined by the loss of histone fluorescence in the next  
1107 time frame upon fork encounter. Histone transfer was assigned when, upon fork encounter, histone-  
1108 associated fluorescence was incorporated into the replication bubble and could be followed for at  
1109 least three subsequent time frames (3 minutes). Nucleosome (histone) sliding was determined by a  
1110 unified histone-fork movement over at least 3 pixels (0.48  $\mu$ M;  $\sim$ 2.3 kbp). Replication fork stalling was  
1111 assigned if a fork movement was arrested by a static (within 1 pixel) histone fluorescence for at least  
1112 three time frames (3 minutes). Stalling events on nucleosomes showing particularly high histone  
1113 fluorescence (over three times higher than the local average) were excluded from the analysis as they  
1114 are likely to represent multiple nucleosomes on singly-tethered DNA or higher order local structure  
1115 on doubly tethered DNA molecules. For the overall outcome quantification, all assigned events were  
1116 counted, including the secondary events; for example, if a nucleosome (histone) sliding was followed  
1117 by eviction, both sliding and eviction would be included in the quantification. A separate secondary  
1118 outcome quantification was also conducted to gain insight into the outcome probability of  
1119 nucleosome (histone) sliding and replication fork stalling.  
1120

1121 **REFERENCES**

- 1122 Alabert, C., Barth, T.K., Reveron-Gomez, N., Sidoli, S., Schmidt, A., Jensen, O.N., Imhof, A., and Groth,  
1123 A. (2015). Two distinct modes for propagation of histone PTMs across the cell cycle. *Genes Dev* 29,  
1124 585-590.
- 1125 Alabert, C., Jasencakova, Z., and Groth, A. (2017). Chromatin Replication and Histone Dynamics. *Adv*  
1126 *Exp Med Biol* 1042, 311-333.
- 1127 Annunziato, A.T. (2013). Assembling chromatin: the long and winding road. *Biochim Biophys Acta*  
1128 1819, 196-210.
- 1129 Annunziato, A.T. (2015). The Fork in the Road: Histone Partitioning During DNA Replication. *Genes*  
1130 (Basel) 6, 353-371.
- 1131 Bonev, B., and Cavalli, G. (2016). Organization and function of the 3D genome. *Nat Rev Genet* 17, 772.
- 1132 Bowman, G.D. (2010). Mechanisms of ATP-dependent nucleosome sliding. *Curr Opin Struct Biol* 20,  
1133 73-81.
- 1134 Clement, C., Orsi, G.A., Gatto, A., Boyarchuk, E., Forest, A., Hajj, B., Mine-Hattab, J., Garnier, M.,  
1135 Gurard-Levin, Z.A., Quivy, J.P., *et al.* (2018). High-resolution visualization of H3 variants during  
1136 replication reveals their controlled recycling. *Nat Commun* 9, 3181.
- 1137 Dyer, P.N., Edayathumangalam, R.S., White, C.L., Bao, Y., Chakravarthy, S., Muthurajan, U.M., and  
1138 Luger, K. (2004). Reconstitution of nucleosome core particles from recombinant histones and DNA.  
1139 *Methods Enzymol* 375, 23-44.
- 1140 Escobar, T., Oksuz, O., Descostes, N., Bonasio, R., and Reinberg, D. (2019). Active and repressed  
1141 chromatin domains exhibit distinct nucleosome segregation during DNA replication. *bioRxiv*, 418707.
- 1142 Falk, M., Feodorova, Y., Naumova, N., Imakaev, M., Lajoie, B.R., Leonhardt, H., Joffe, B., Dekker, J.,  
1143 Fudenberg, G., Solovei, I., *et al.* (2019). Publisher Correction: Heterochromatin drives  
1144 compartmentalization of inverted and conventional nuclei. *Nature* 572, E22.
- 1145 Foltman, M., Evrin, C., De Piccoli, G., Jones, R.C., Edmondson, R.D., Katou, Y., Nakato, R., Shirahige, K.,  
1146 and Labib, K. (2013). Eukaryotic replisome components cooperate to process histones during  
1147 chromosome replication. *Cell Rep* 3, 892-904.
- 1148 Gan, H., Serra-Cardona, A., Hua, X., Zhou, H., Labib, K., Yu, C., and Zhang, Z. (2018). The Mcm2-Ctf4-  
1149 Polalpha Axis Facilitates Parental Histone H3-H4 Transfer to Lagging Strands. *Mol Cell* 72, 140-151  
1150 e143.
- 1151 Gasser, R., Koller, T., and Sogo, J.M. (1996). The stability of nucleosomes at the replication fork. *J Mol*  
1152 *Biol* 258, 224-239.
- 1153 Groth, A., Corpet, A., Cook, A.J., Roche, D., Bartek, J., Lukas, J., and Almouzni, G. (2007). Regulation of  
1154 replication fork progression through histone supply and demand. *Science* 318, 1928-1931.
- 1155 Gunjan, A., and Verreault, A. (2003). A Rad53 kinase-dependent surveillance mechanism that  
1156 regulates histone protein levels in *S. cerevisiae*. *Cell* 115, 537-549.
- 1157 Gupta, P., Zlatanova, J., and Tomschik, M. (2009). Nucleosome assembly depends on the torsion in the  
1158 DNA molecule: a magnetic tweezers study. *Biophys J* 97, 3150-3157.
- 1159 Gurard-Levin, Z.A., Quivy, J.P., and Almouzni, G. (2014). Histone chaperones: assisting histone traffic  
1160 and nucleosome dynamics. *Annu Rev Biochem* 83, 487-517.
- 1161 Han, M., Chang, M., Kim, U.J., and Grunstein, M. (1987). Histone H2B repression causes cell-cycle-  
1162 specific arrest in yeast: effects on chromosomal segregation, replication, and transcription. *Cell* 48,  
1163 589-597.
- 1164 Huang, H., Stromme, C.B., Saredi, G., Hodl, M., Strandsby, A., Gonzalez-Aguilera, C., Chen, S., Groth,  
1165 A., and Patel, D.J. (2015). A unique binding mode enables MCM2 to chaperone histones H3-H4 at  
1166 replication forks. *Nat Struct Mol Biol* 22, 618-626.
- 1167 Ishimi, Y., Komamura, Y., You, Z., and Kimura, H. (1998). Biochemical function of mouse  
1168 minichromosome maintenance 2 protein. *J Biol Chem* 273, 8369-8375.
- 1169 Jackson, V. (1990). In vivo studies on the dynamics of histone-DNA interaction: evidence for  
1170 nucleosome dissolution during replication and transcription and a low level of dissolution  
1171 independent of both. *Biochemistry* 29, 719-731.

- 1172 Kim, U.J., Han, M., Kayne, P., and Grunstein, M. (1988). Effects of histone H4 depletion on the cell  
1173 cycle and transcription of *Saccharomyces cerevisiae*. *EMBO J* 7, 2211-2219.
- 1174 Kimura, H., and Cook, P.R. (2001). Kinetics of core histones in living human cells: little exchange of H3  
1175 and H4 and some rapid exchange of H2B. *J Cell Biol* 153, 1341-1353.
- 1176 Kose, H.B., Larsen, N.B., Duxin, J.P., and Yardimci, H. (2019). Dynamics of the Eukaryotic Replicative  
1177 Helicase at Lagging-Strand Protein Barriers Support the Steric Exclusion Model. *Cell Rep* 26, 2113-2125  
1178 e2116.
- 1179 Kurat, C.F., Yeeles, J.T.P., Patel, H., Early, A., and Diffley, J.F.X. (2017). Chromatin Controls DNA  
1180 Replication Origin Selection, Lagging-Strand Synthesis, and Replication Fork Rates. *Mol Cell* 65, 117-  
1181 130.
- 1182 Lai, W.K.M., and Pugh, B.F. (2017). Understanding nucleosome dynamics and their links to gene  
1183 expression and DNA replication. *Nat Rev Mol Cell Biol* 18, 548-562.
- 1184 Larson, A.G., Elnatan, D., Keenen, M.M., Trnka, M.J., Johnston, J.B., Burlingame, A.L., Agard, D.A.,  
1185 Redding, S., and Narlikar, G.J. (2017). Liquid droplet formation by HP1alpha suggests a role for phase  
1186 separation in heterochromatin. *Nature* 547, 236-240.
- 1187 Lebofsky, R., Takahashi, T., and Walter, J.C. (2009). DNA replication in nucleus-free *Xenopus* egg  
1188 extracts. *Methods Mol Biol* 521, 229-252.
- 1189 Louters, L., and Chalkley, R. (1985). Exchange of histones H1, H2A, and H2B in vivo. *Biochemistry* 24,  
1190 3080-3085.
- 1191 Loveland, A.B., Habuchi, S., Walter, J.C., and van Oijen, A.M. (2012). A general approach to break the  
1192 concentration barrier in single-molecule imaging. *Nat Methods* 9, 987-992.
- 1193 Luger, K., Mader, A.W., Richmond, R.K., Sargent, D.F., and Richmond, T.J. (1997). Crystal structure of  
1194 the nucleosome core particle at 2.8 Å resolution. *Nature* 389, 251-260.
- 1195 MacAlpine, D.M., and Almouzni, G. (2013). Chromatin and DNA replication. *Cold Spring Harb Perspect*  
1196 *Biol* 5, a010207.
- 1197 Madamba, E.V., Berthet, E.B., and Francis, N.J. (2017). Inheritance of Histones H3 and H4 during DNA  
1198 Replication In Vitro. *Cell Rep* 21, 1361-1374.
- 1199 Marzluff, W.F., Wagner, E.J., and Duronio, R.J. (2008). Metabolism and regulation of canonical histone  
1200 mRNAs: life without a poly(A) tail. *Nat Rev Genet* 9, 843-854.
- 1201 Mejlvang, J., Feng, Y., Alabert, C., Neelsen, K.J., Jasencakova, Z., Zhao, X., Lees, M., Sandelin, A., Pasero,  
1202 P., Lopes, M., *et al.* (2014). New histone supply regulates replication fork speed and PCNA unloading.  
1203 *J Cell Biol* 204, 29-43.
- 1204 Nelson, D.M., Ye, X., Hall, C., Santos, H., Ma, T., Kao, G.D., Yen, T.J., Harper, J.W., and Adams, P.D.  
1205 (2002). Coupling of DNA synthesis and histone synthesis in S phase independent of cyclin/cdk2 activity.  
1206 *Mol Cell Biol* 22, 7459-7472.
- 1207 Newport, J., and Kirschner, M. (1982). A major developmental transition in early *Xenopus* embryos: II.  
1208 Control of the onset of transcription. *Cell* 30, 687-696.
- 1209 Petryk, N., Dalby, M., Wenger, A., Stromme, C.B., Strandsby, A., Andersson, R., and Groth, A. (2018).  
1210 MCM2 promotes symmetric inheritance of modified histones during DNA replication. *Science* 361,  
1211 1389-1392.
- 1212 Ramachandran, S., and Henikoff, S. (2015). Replicating Nucleosomes. *Sci Adv* 1.
- 1213 Reinberg, D., and Vales, L.D. (2018). Chromatin domains rich in inheritance. *Science* 361, 33-34.
- 1214 Reveron-Gomez, N., Gonzalez-Aguilera, C., Stewart-Morgan, K.R., Petryk, N., Flury, V., Graziano, S.,  
1215 Johansen, J.V., Jakobsen, J.S., Alabert, C., and Groth, A. (2018). Accurate Recycling of Parental Histones  
1216 Reproduces the Histone Modification Landscape during DNA Replication. *Mol Cell* 72, 239-249 e235.
- 1217 Rhind, N., and Gilbert, D.M. (2013). DNA replication timing. *Cold Spring Harb Perspect Biol* 5, a010132.
- 1218 Sekinger, E.A., Moqtaderi, Z., and Struhl, K. (2005). Intrinsic histone-DNA interactions and low  
1219 nucleosome density are important for preferential accessibility of promoter regions in yeast. *Mol Cell*  
1220 18, 735-748.
- 1221 Serra-Cardona, A., and Zhang, Z. (2018). Replication-Coupled Nucleosome Assembly in the Passage of  
1222 Epigenetic Information and Cell Identity. *Trends Biochem Sci* 43, 136-148.

- 1223 Shundrovsky, A., Smith, C.L., Lis, J.T., Peterson, C.L., and Wang, M.D. (2006). Probing SWI/SNF  
1224 remodeling of the nucleosome by unzipping single DNA molecules. *Nat Struct Mol Biol* 13, 549-554.
- 1225 Sogo, J.M., Stahl, H., Koller, T., and Knippers, R. (1986). Structure of replicating simian virus 40  
1226 minichromosomes. The replication fork, core histone segregation and terminal structures. *J Mol Biol*  
1227 189, 189-204.
- 1228 Solovei, I., Thanisch, K., and Feodorova, Y. (2016). How to rule the nucleus: divide et impera. *Curr Opin*  
1229 *Cell Biol* 40, 47-59.
- 1230 Stillman, B. (2018). Histone Modifications: Insights into Their Influence on Gene Expression. *Cell* 175,  
1231 6-9.
- 1232 Strom, A.R., Emelyanov, A.V., Mir, M., Fyodorov, D.V., Darzacq, X., and Karpen, G.H. (2017). Phase  
1233 separation drives heterochromatin domain formation. *Nature* 547, 241-245.
- 1234 Swoboda, M., Henig, J., Cheng, H.M., Brugger, D., Haltrich, D., Plumere, N., and Schlierf, M. (2012).  
1235 Enzymatic oxygen scavenging for photostability without pH drop in single-molecule experiments. *ACS*  
1236 *Nano* 6, 6364-6369.
- 1237 Thastrom, A., Bingham, L.M., and Widom, J. (2004a). Nucleosomal locations of dominant DNA  
1238 sequence motifs for histone-DNA interactions and nucleosome positioning. *J Mol Biol* 338, 695-709.
- 1239 Thastrom, A., Lowary, P.T., and Widom, J. (2004b). Measurement of histone-DNA interaction free  
1240 energy in nucleosomes. *Methods* 33, 33-44.
- 1241 Thiriet, C., and Hayes, J.J. (2006). Histone dynamics during transcription: exchange of H2A/H2B dimers  
1242 and H3/H4 tetramers during pol II elongation. *Results Probl Cell Differ* 41, 77-90.
- 1243 van Steensel, B., and Belmont, A.S. (2017). Lamina-Associated Domains: Links with Chromosome  
1244 Architecture, Heterochromatin, and Gene Repression. *Cell* 169, 780-791.
- 1245 Verreault, A., Kaufman, P.D., Kobayashi, R., and Stillman, B. (1998). Nucleosomal DNA regulates the  
1246 core-histone-binding subunit of the human Hat1 acetyltransferase. *Curr Biol* 8, 96-108.
- 1247 Walter, J., and Newport, J. (2000). Initiation of eukaryotic DNA replication: origin unwinding and  
1248 sequential chromatin association of Cdc45, RPA, and DNA polymerase alpha. *Mol Cell* 5, 617-627.
- 1249 Widom, J. (1998). Structure, dynamics, and function of chromatin in vitro. *Annu Rev Biophys Biomol*  
1250 *Struct* 27, 285-327.
- 1251 Woodland, H.R., Flynn, J.M., and Wyllie, A.J. (1979). Utilization of stored mRNA in *Xenopus* embryos  
1252 and its replacement by newly synthesized transcripts: histone H1 synthesis using interspecies hybrids.  
1253 *Cell* 18, 165-171.
- 1254 Xu, M., Long, C., Chen, X., Huang, C., Chen, S., and Zhu, B. (2010). Partitioning of histone H3-H4  
1255 tetramers during DNA replication-dependent chromatin assembly. *Science* 328, 94-98.
- 1256 Yardimci, H., Loveland, A.B., Habuchi, S., van Oijen, A.M., and Walter, J.C. (2010). Uncoupling of sister  
1257 replisomes during eukaryotic DNA replication. *Mol Cell* 40, 834-840.
- 1258 Yardimci, H., Loveland, A.B., van Oijen, A.M., and Walter, J.C. (2012). Single-molecule analysis of DNA  
1259 replication in *Xenopus* egg extracts. *Methods* 57, 179-186.
- 1260 Yu, C., Gan, H., Serra-Cardona, A., Zhang, L., Gan, S., Sharma, S., Johansson, E., Chabes, A., Xu, R.M.,  
1261 and Zhang, Z. (2018). A mechanism for preventing asymmetric histone segregation onto replicating  
1262 DNA strands. *Science* 361, 1386-1389.
- 1263 Zhou, K., Gaullier, G., and Luger, K. (2019). Nucleosome structure and dynamics are coming of age.  
1264 *Nat Struct Mol Biol* 26, 3-13.
- 1265 Zierhut, C., Jenness, C., Kimura, H., and Funabiki, H. (2014). Nucleosomal regulation of chromatin  
1266 composition and nuclear assembly revealed by histone depletion. *Nat Struct Mol Biol* 21, 617-625.
- 1267
